# Supplementary material
Source: PubMed Central journal article supplement (PMC2738142)

# Patient 2

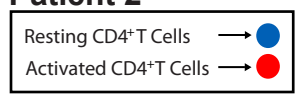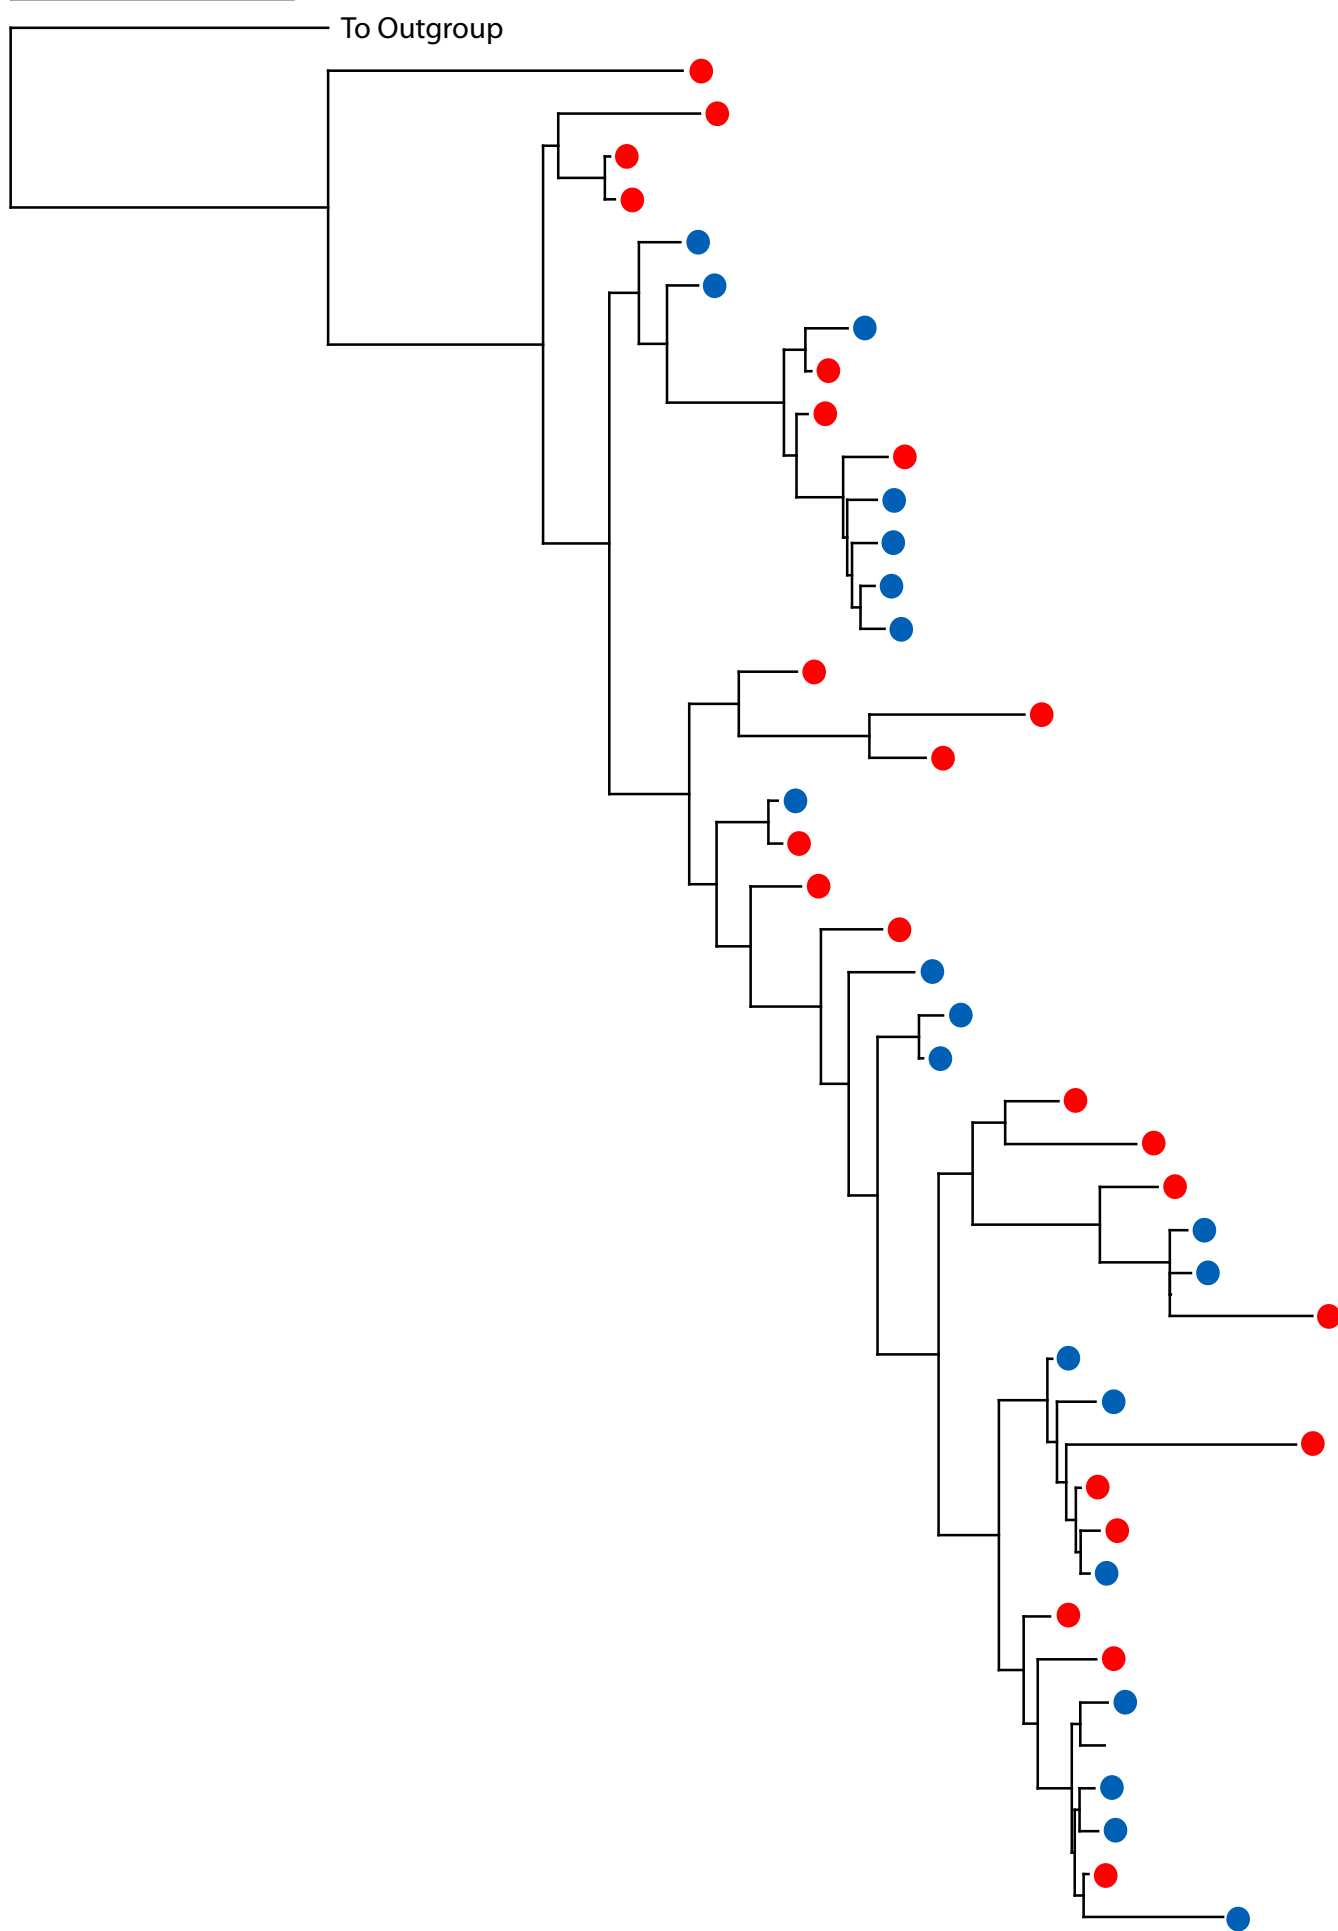

**Patient 4**

**b**

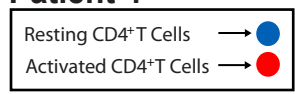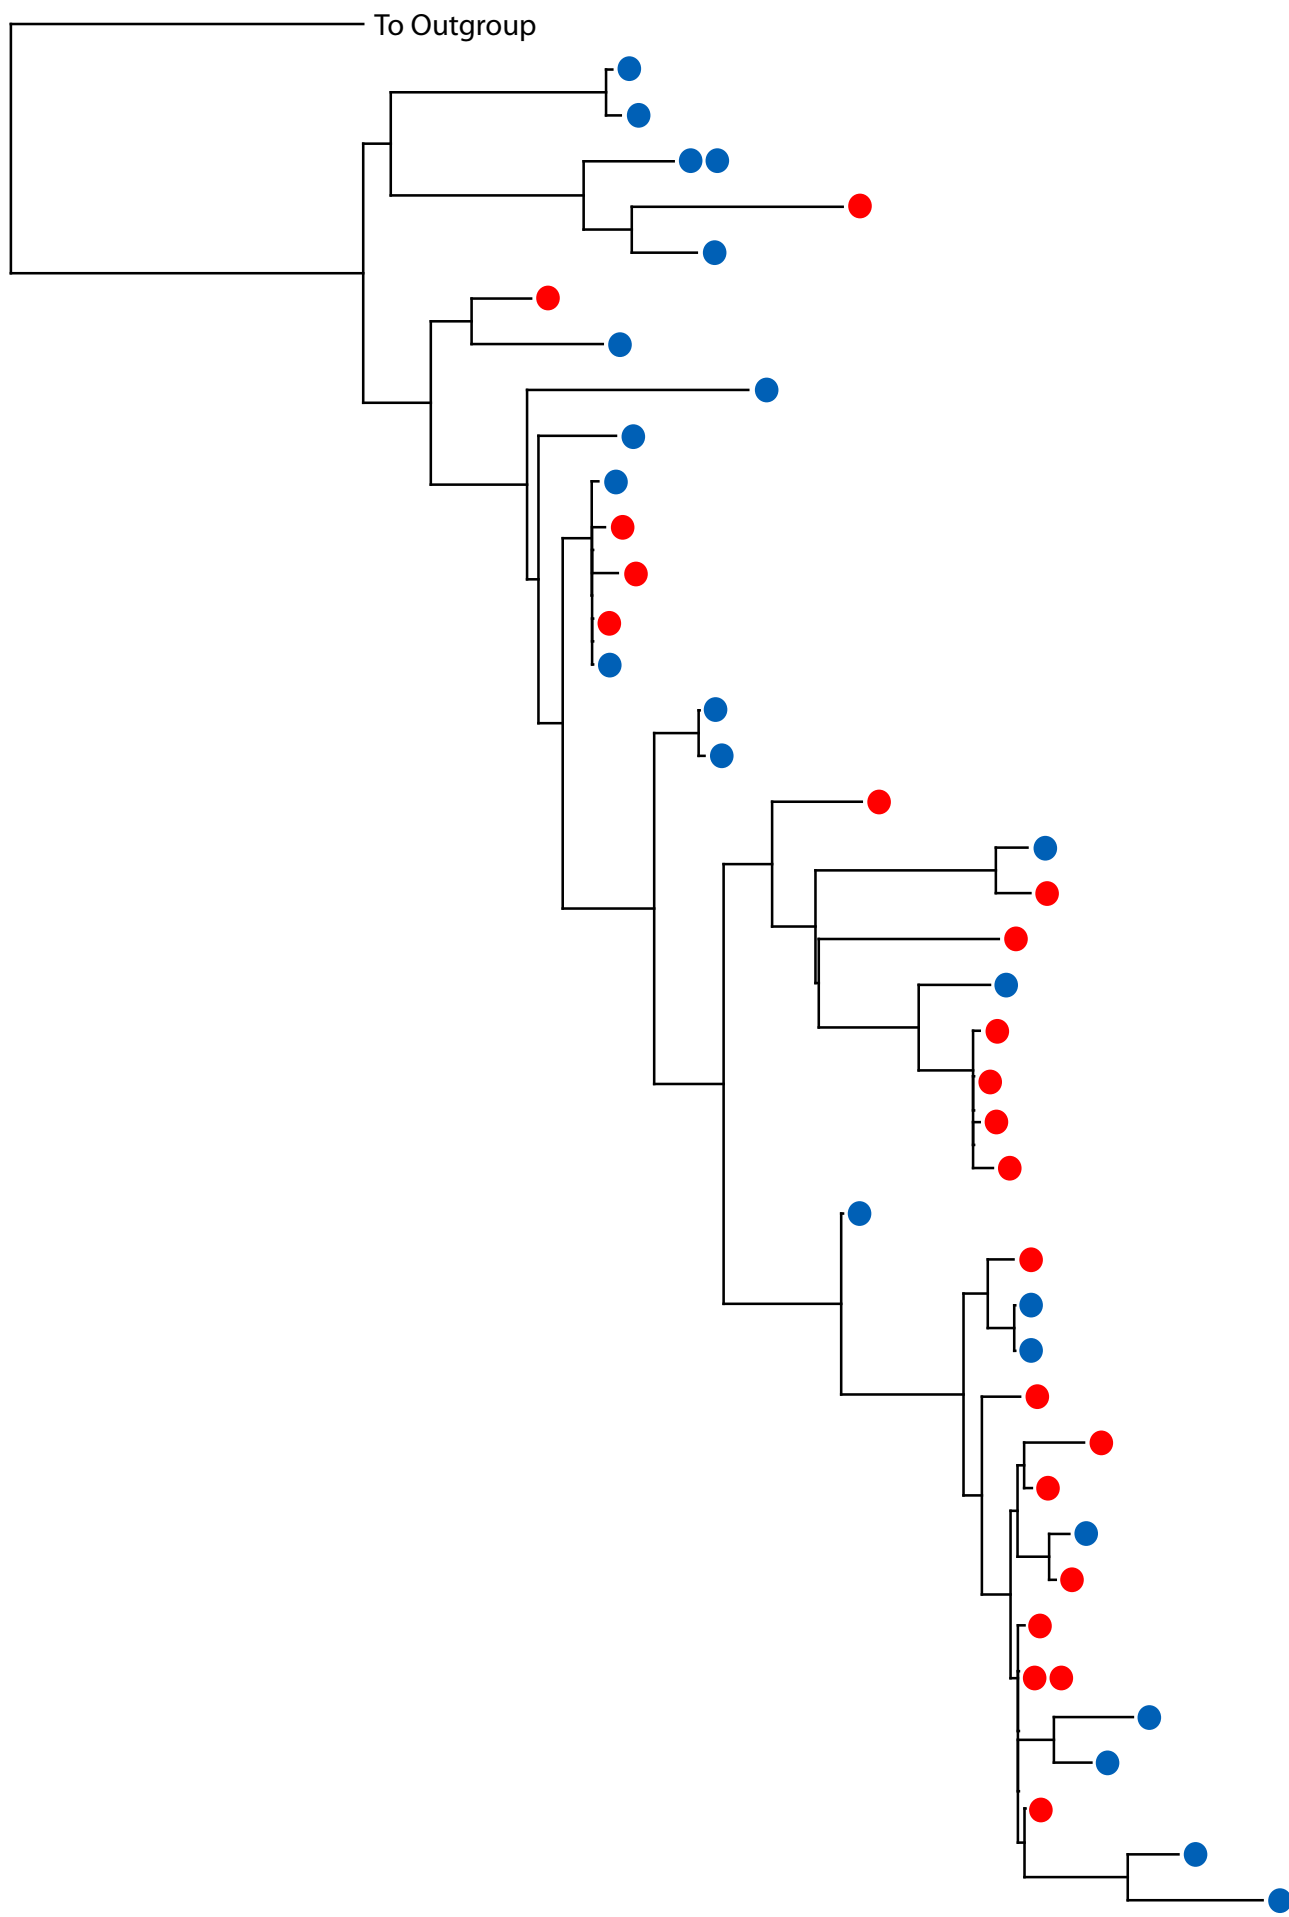

# Patient 5

c

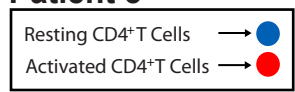

To Outgroup

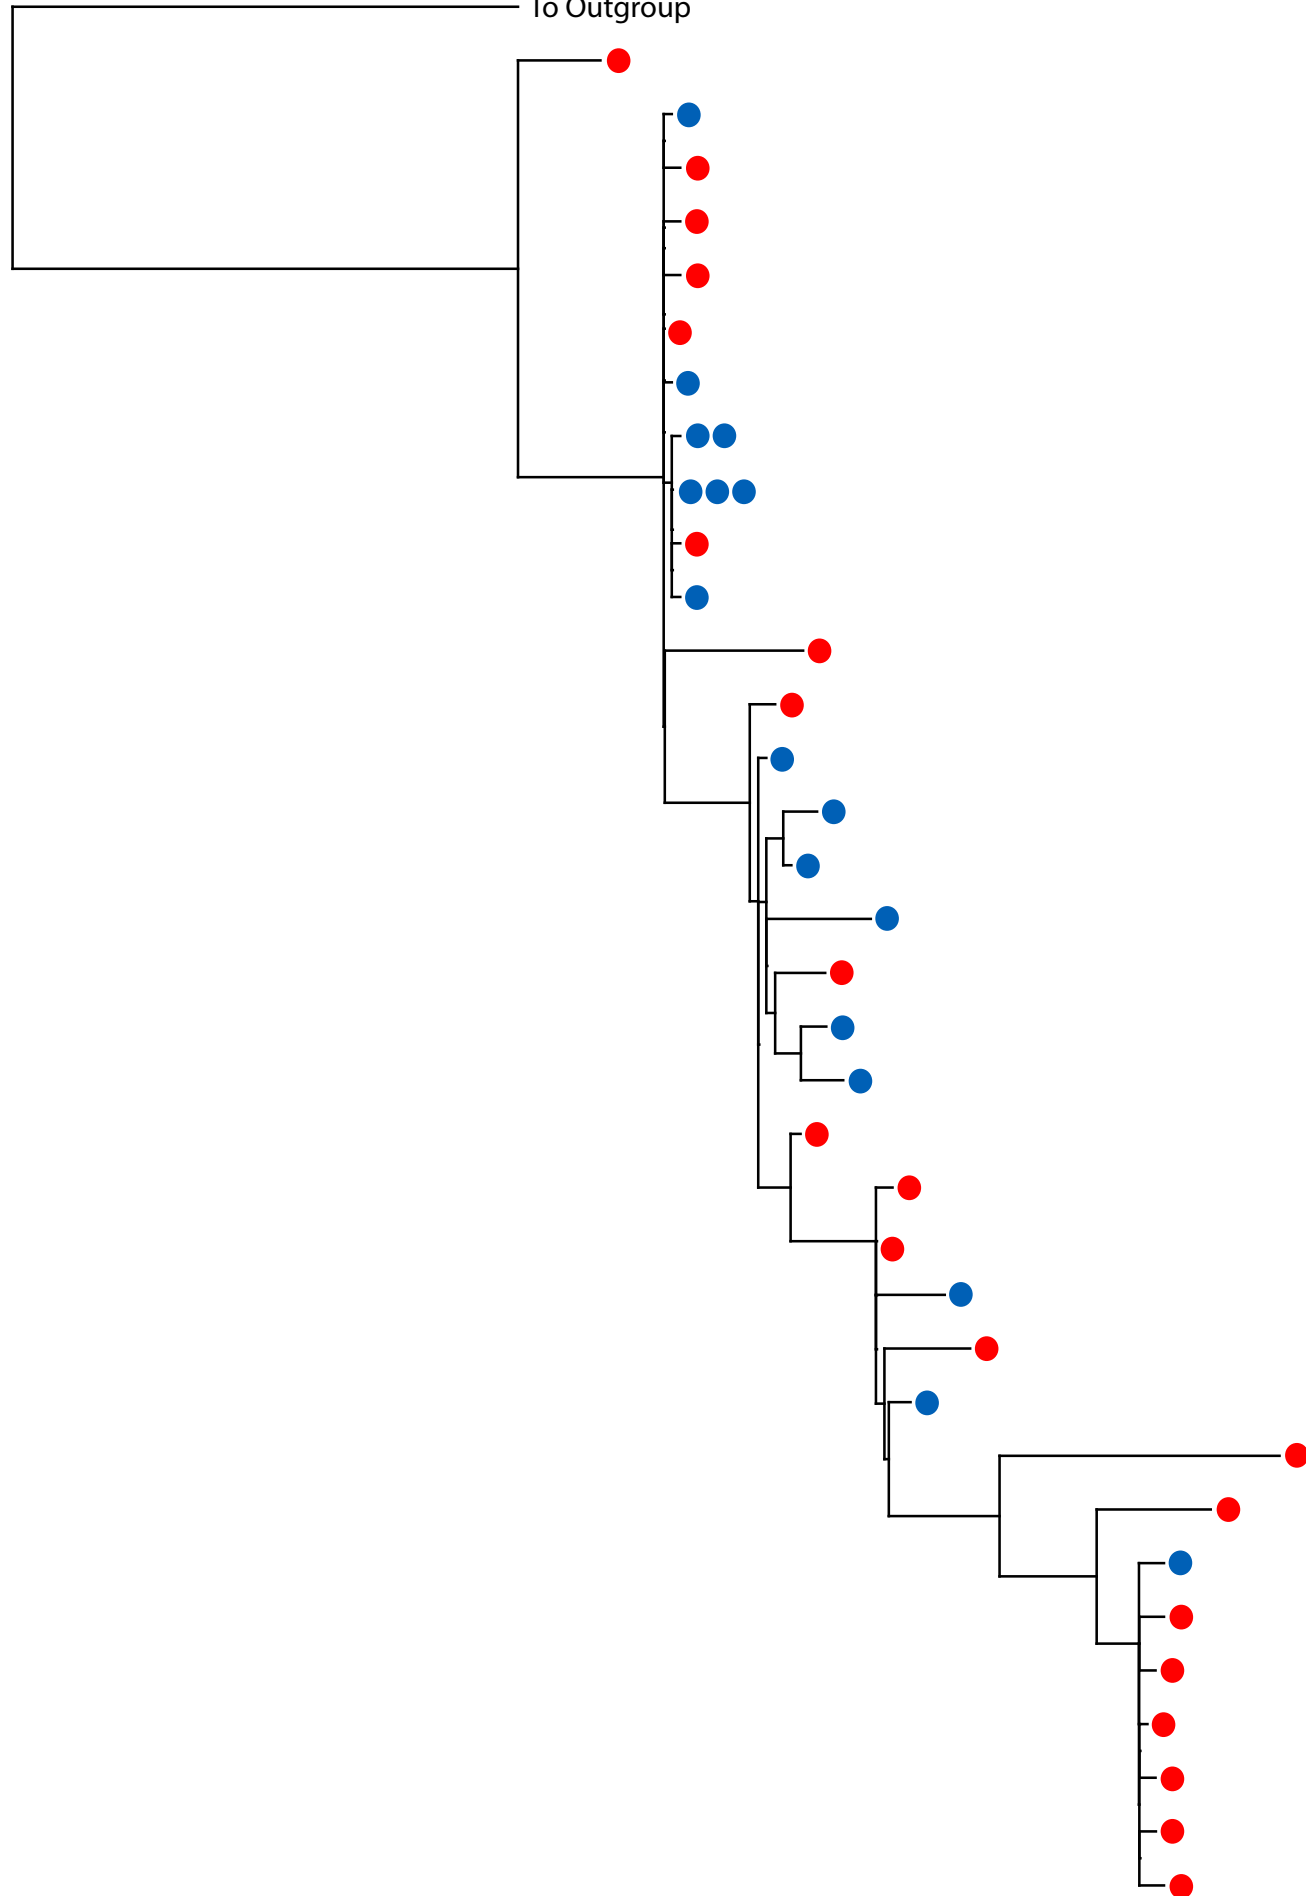

0.1

# Patient 7

d

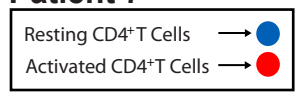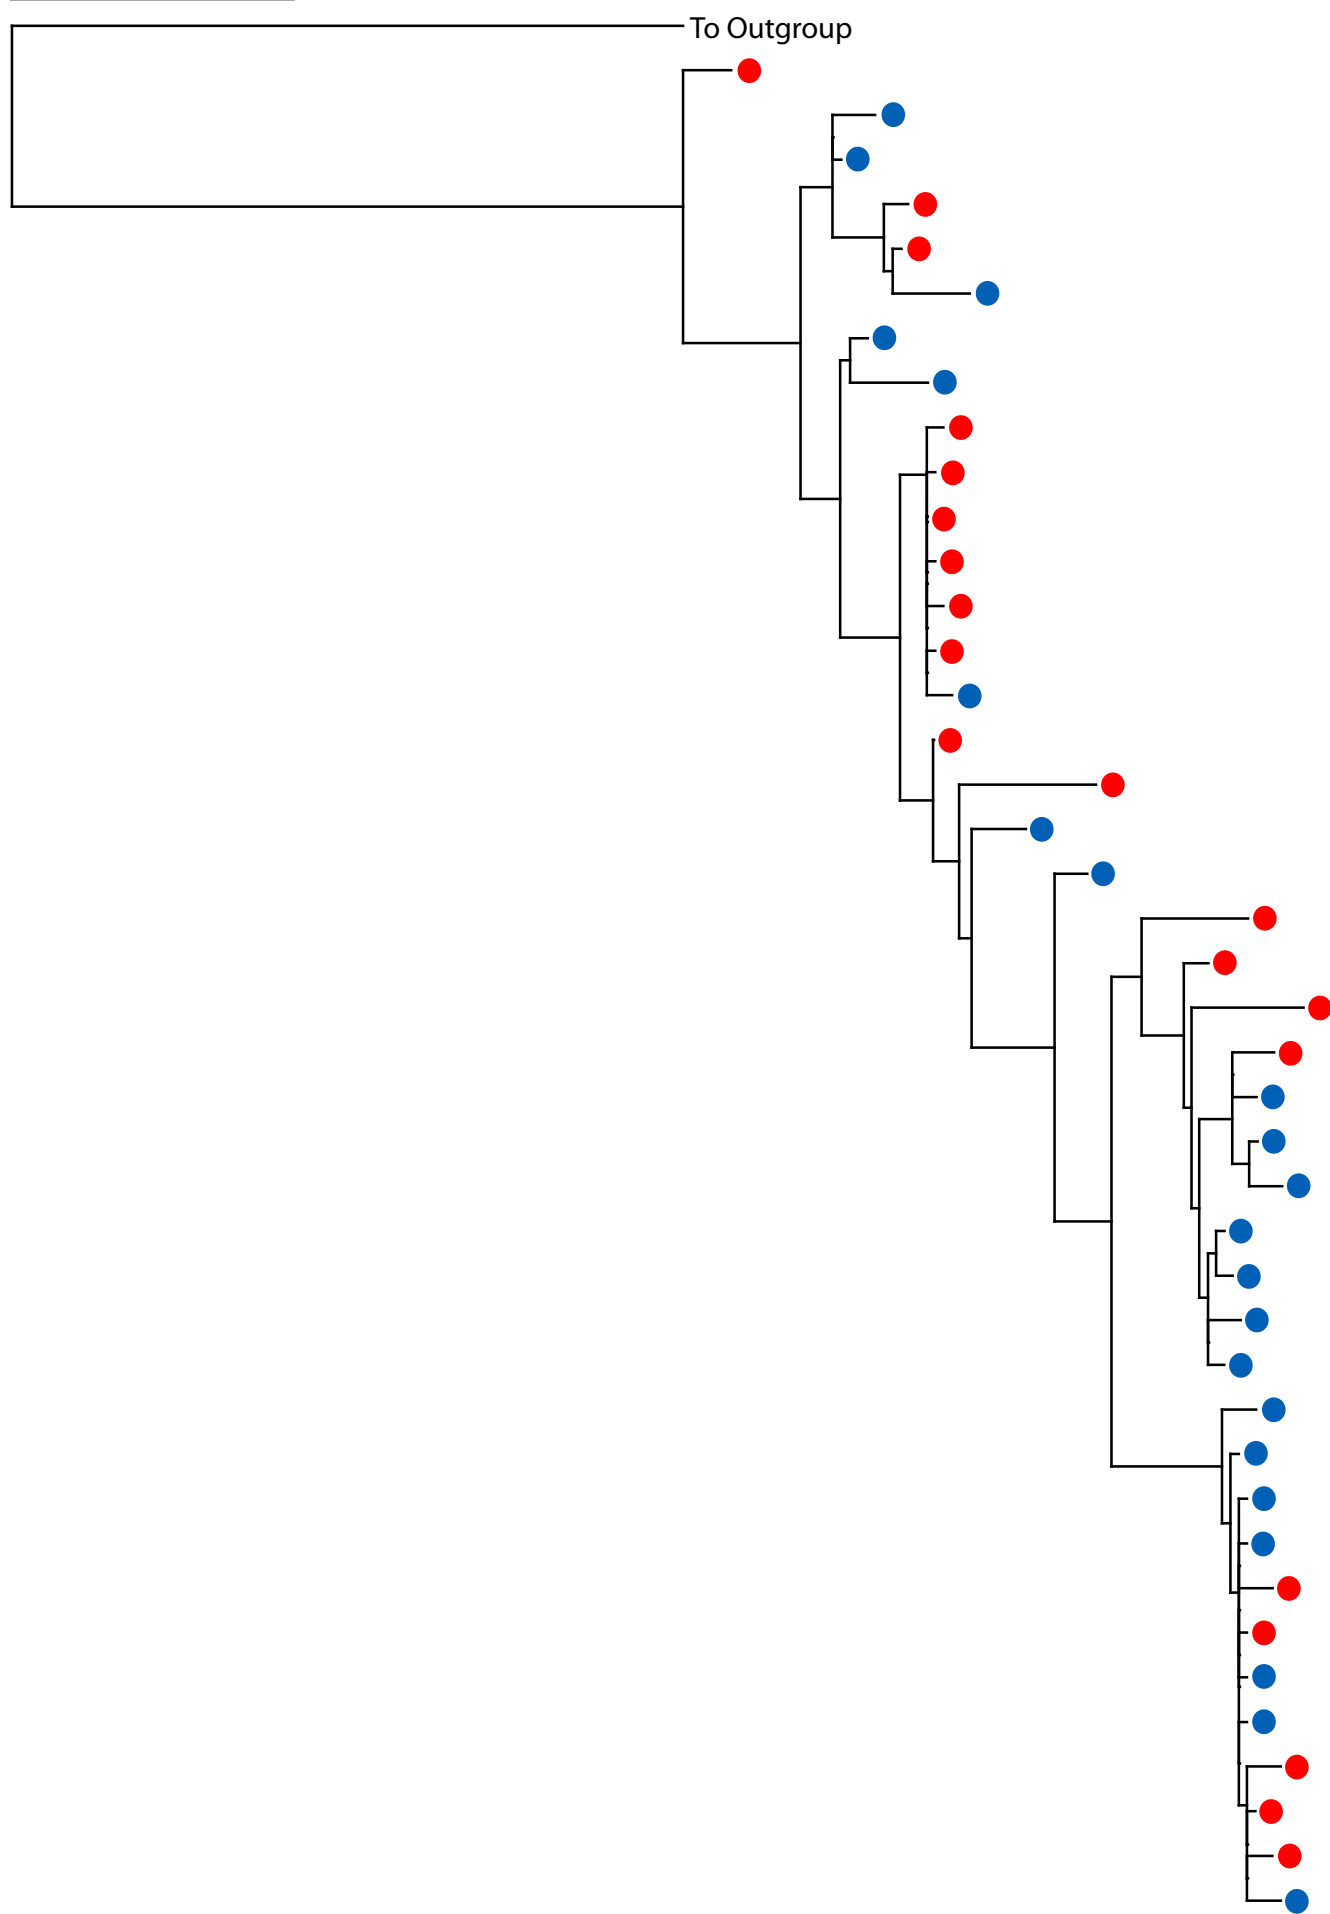

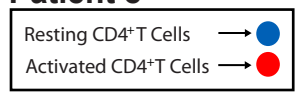

To Outgroup

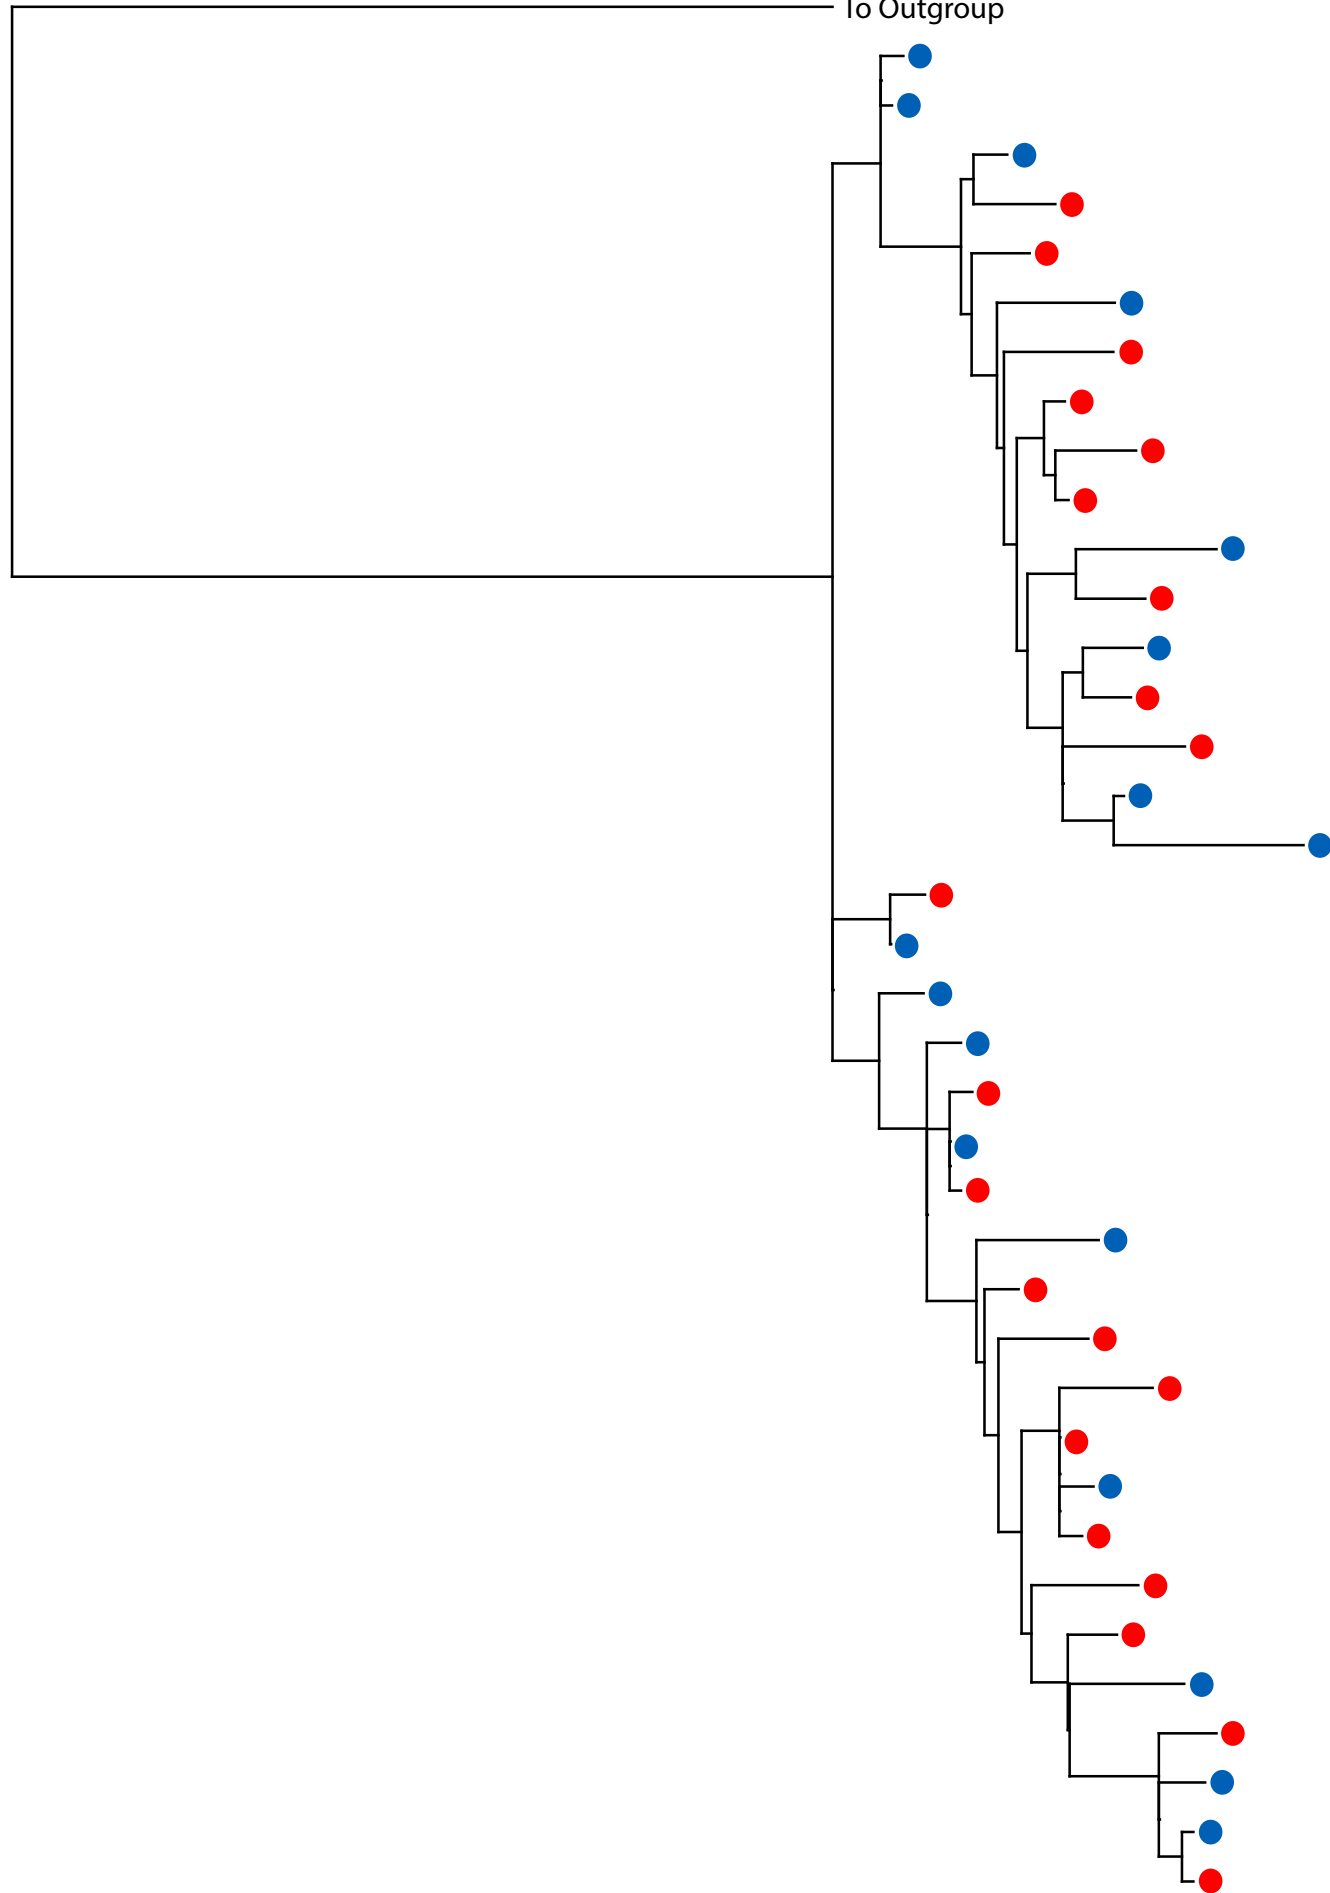

0.1

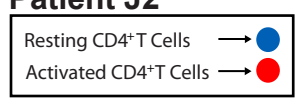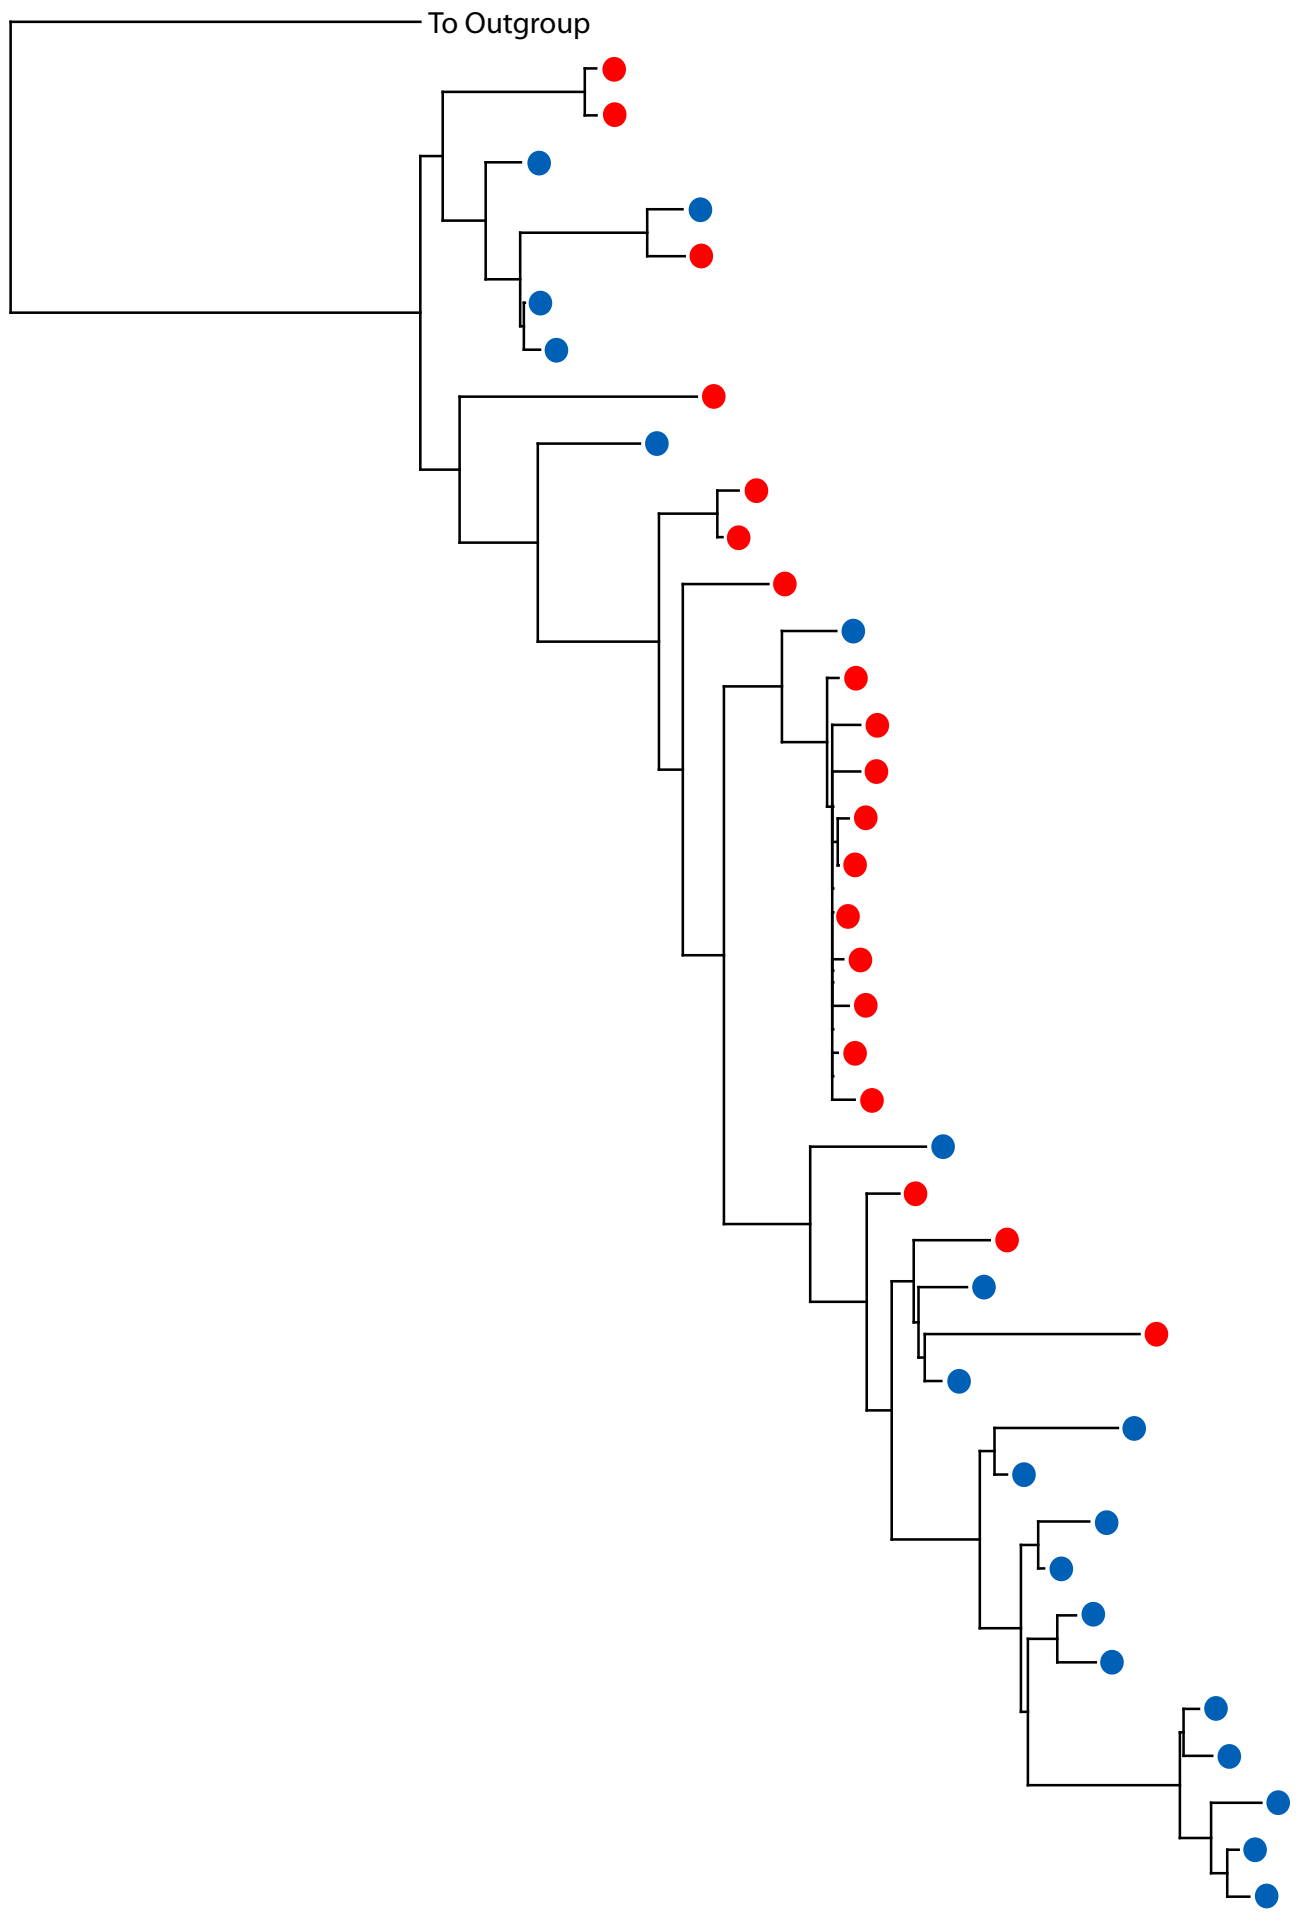

0.1

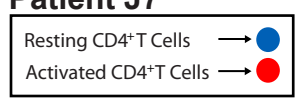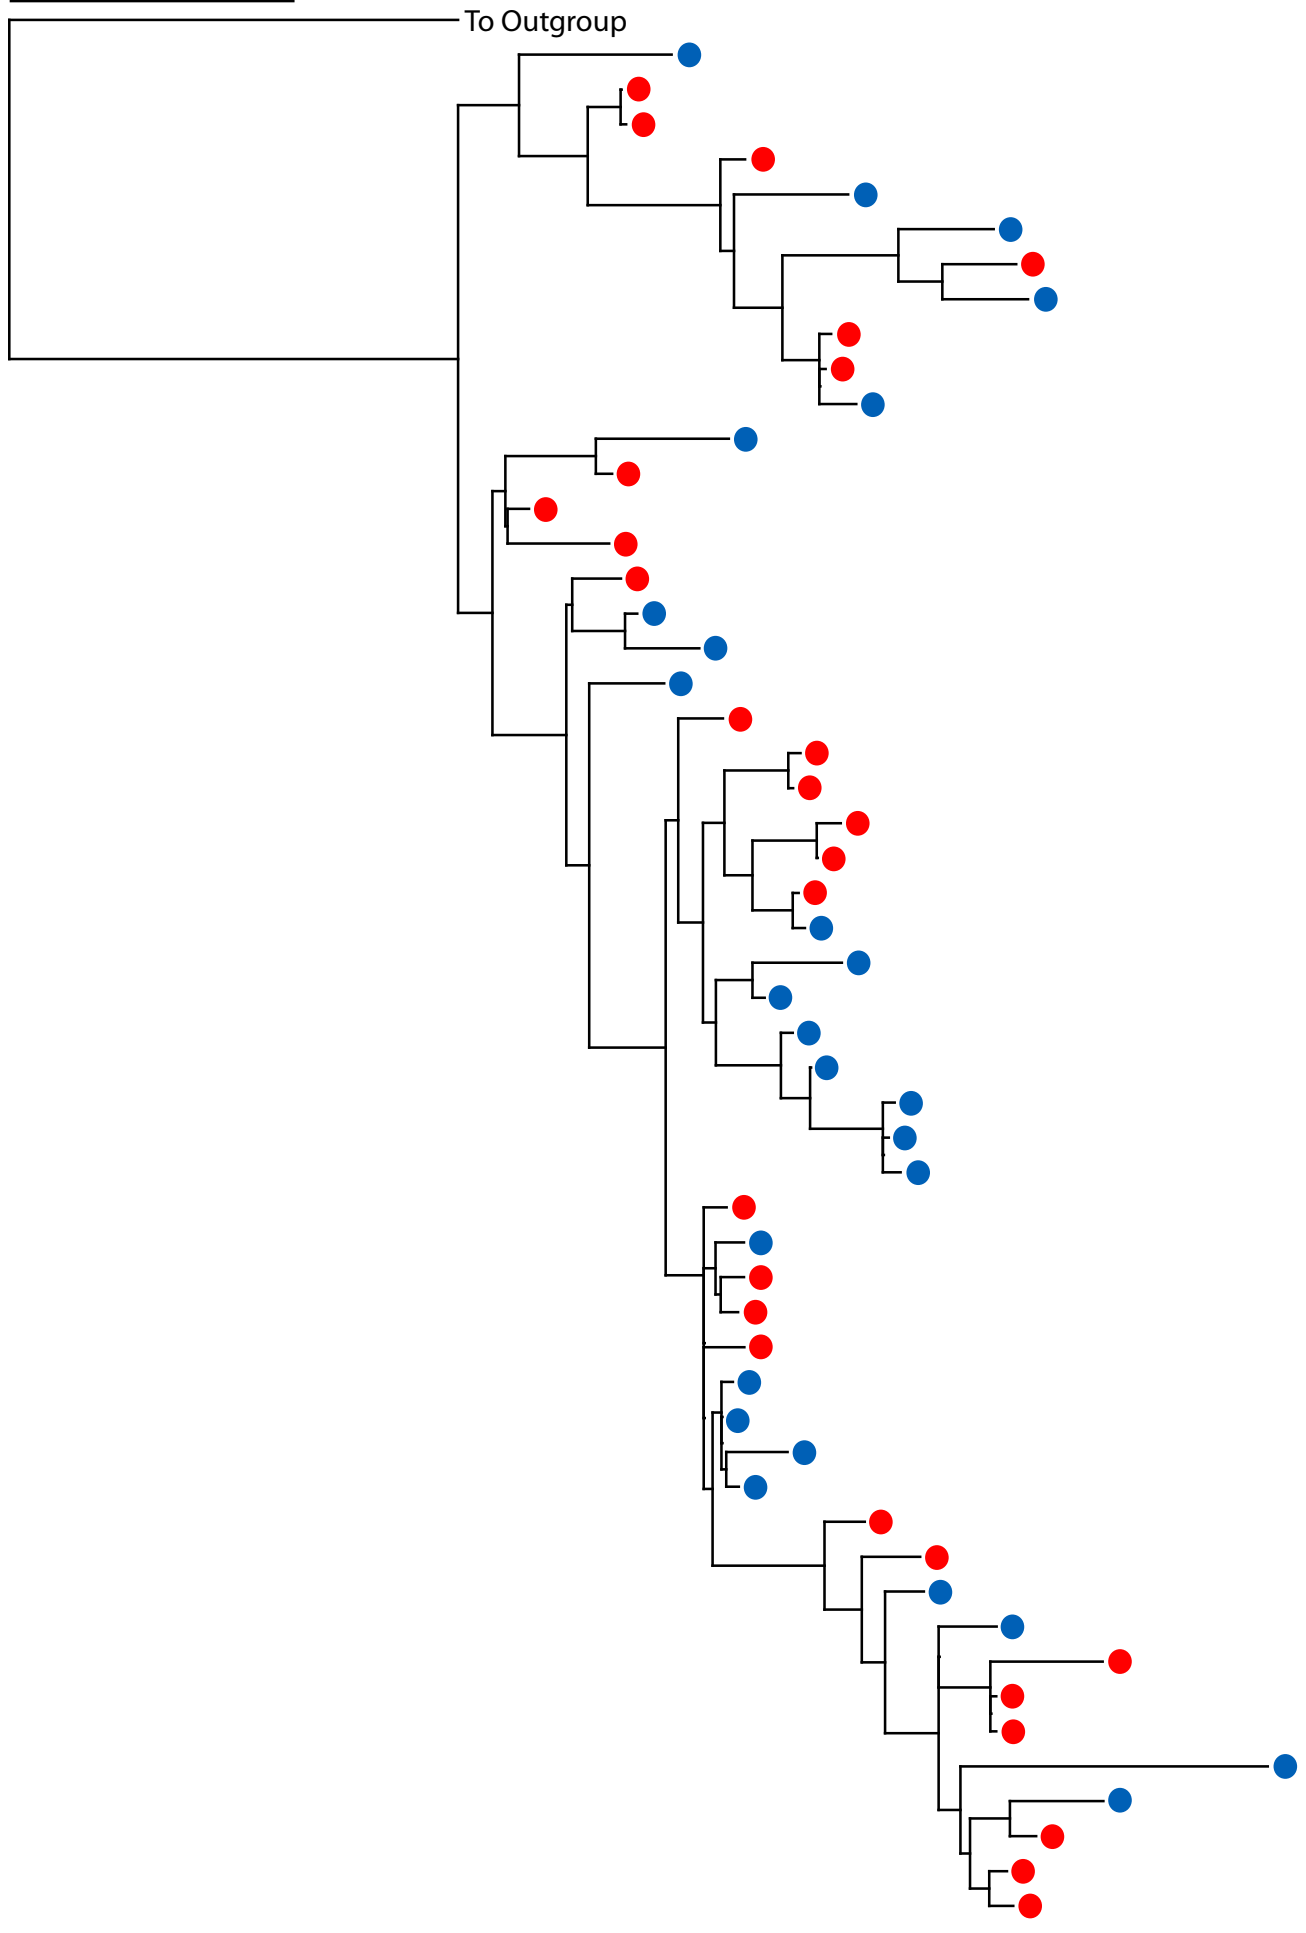

**Patient 099**

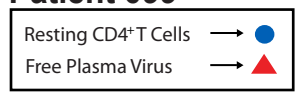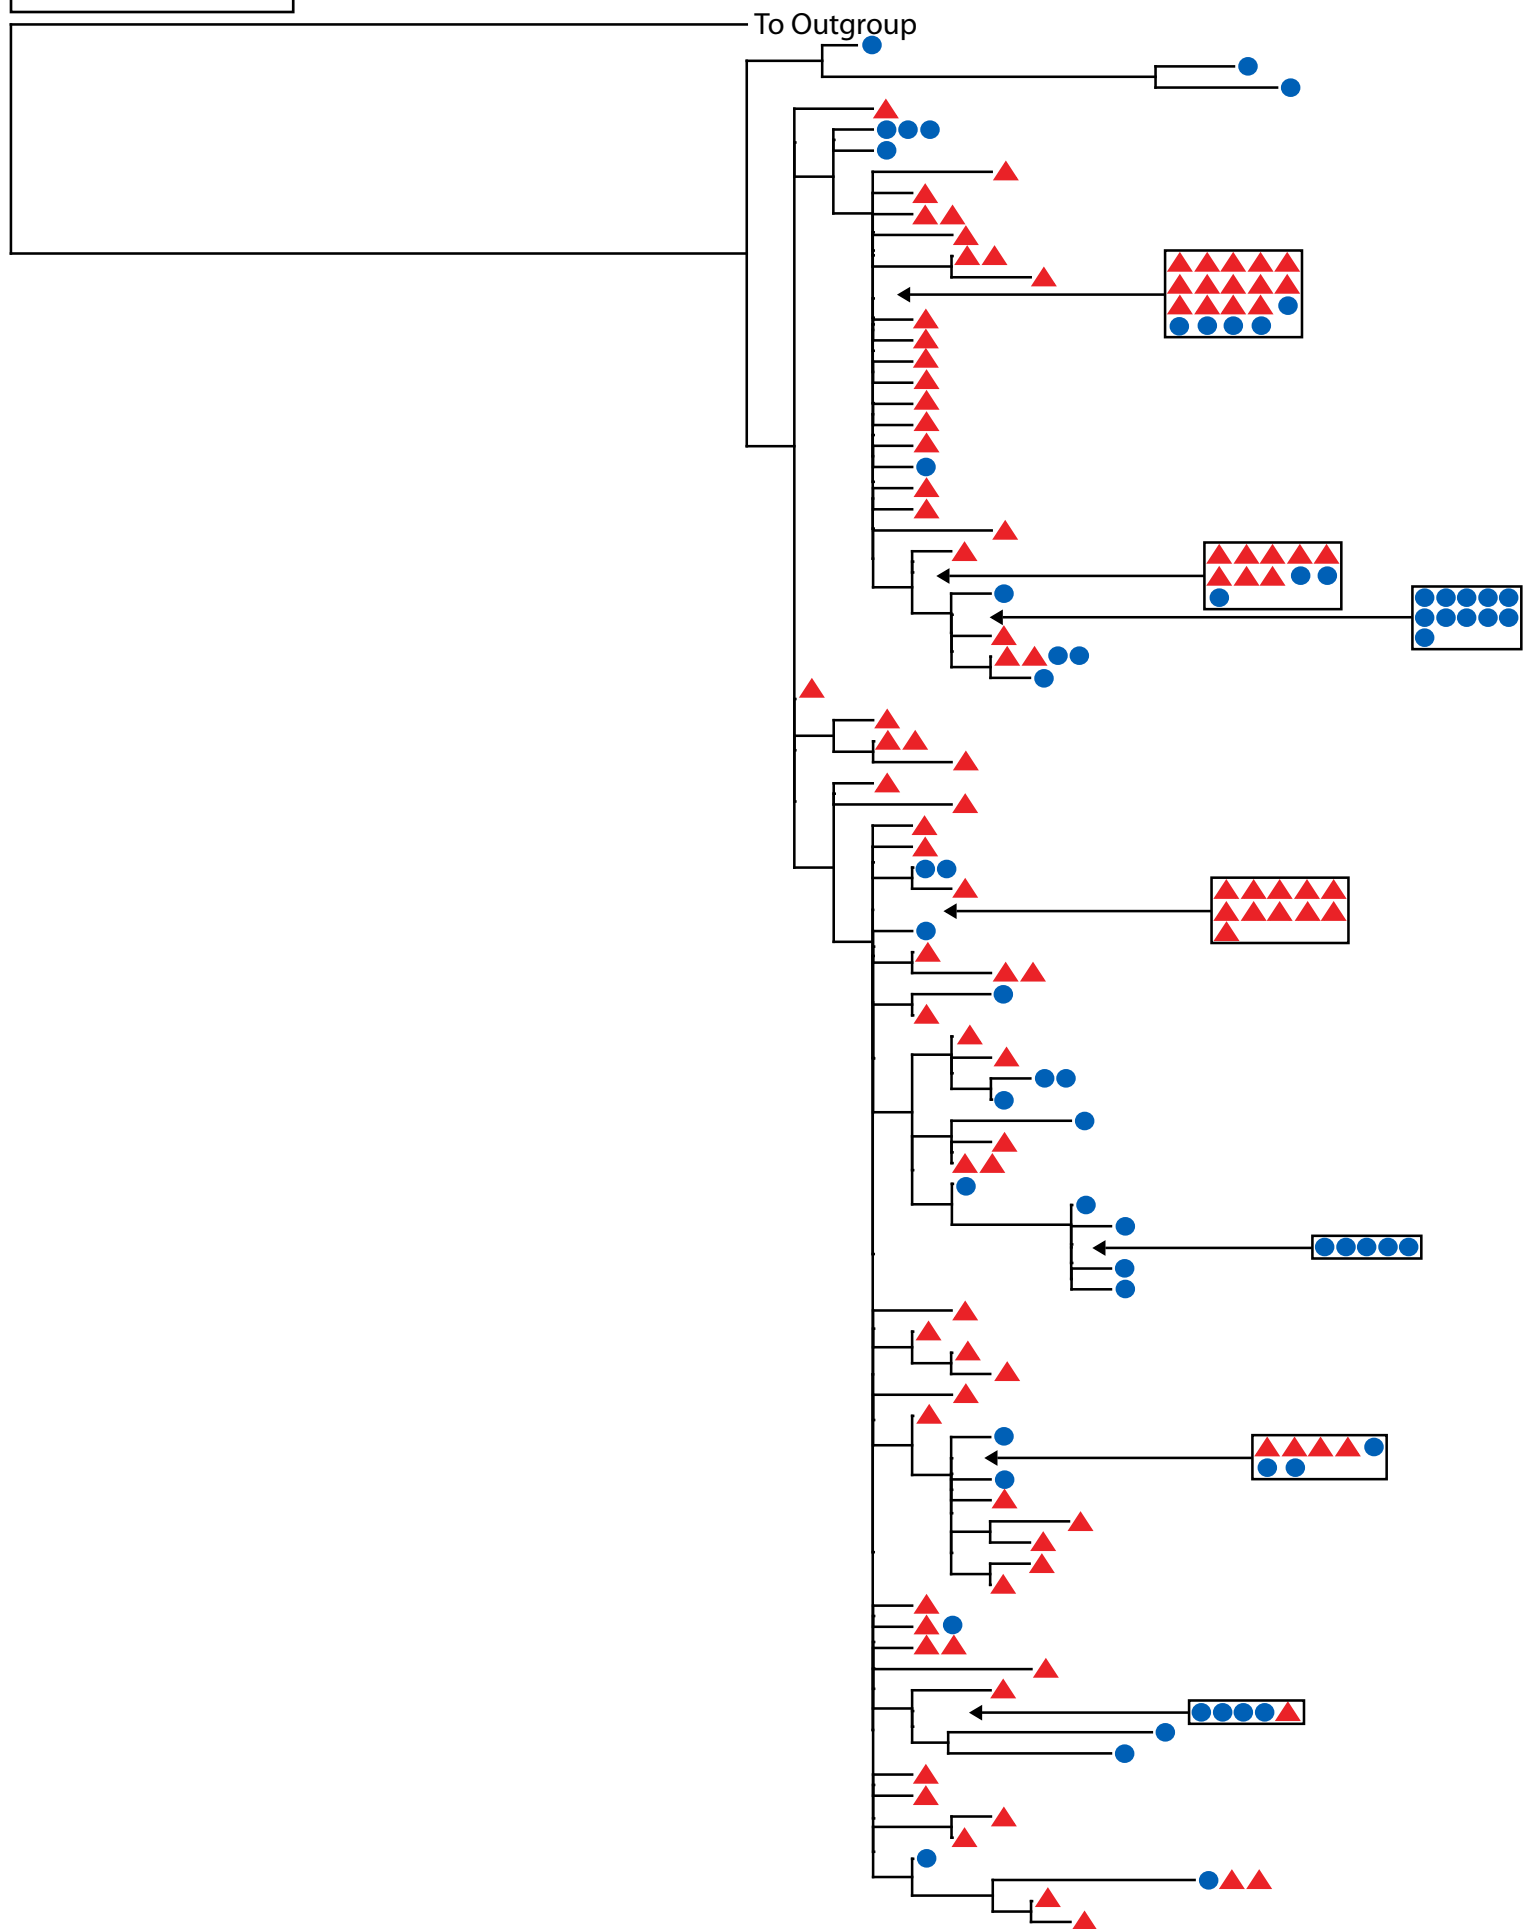



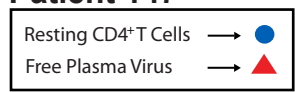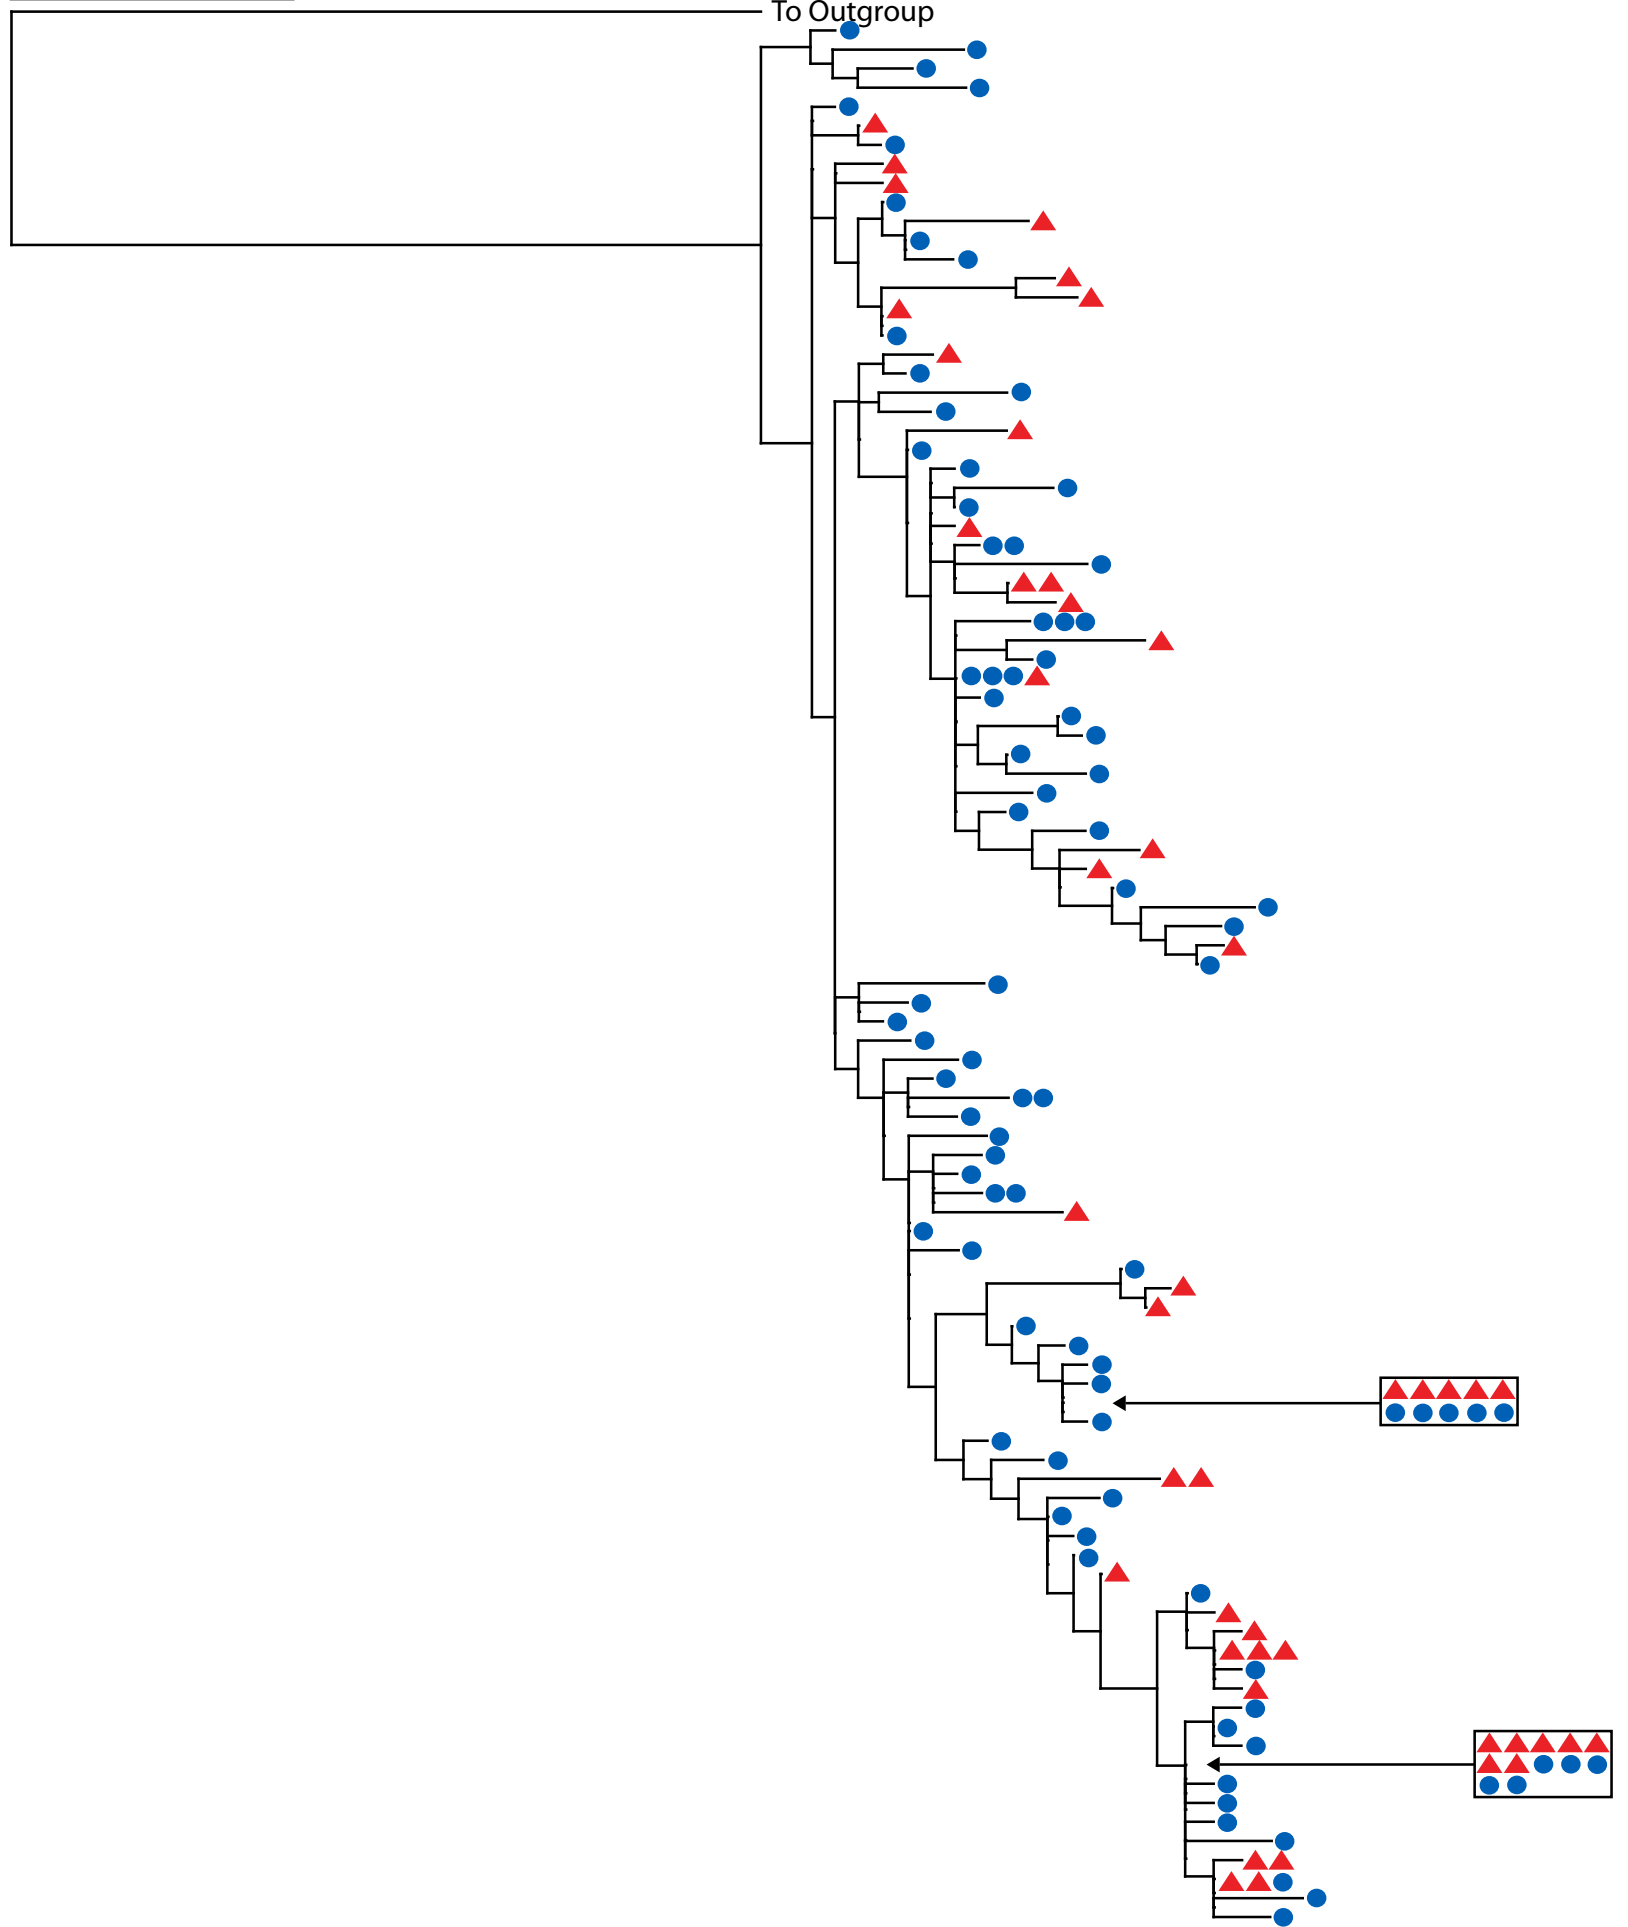

0.1

Resting CD4<sup>+</sup>T Cells → ●  
Free Plasma Virus → ▲

Free CSF Virus → ▲

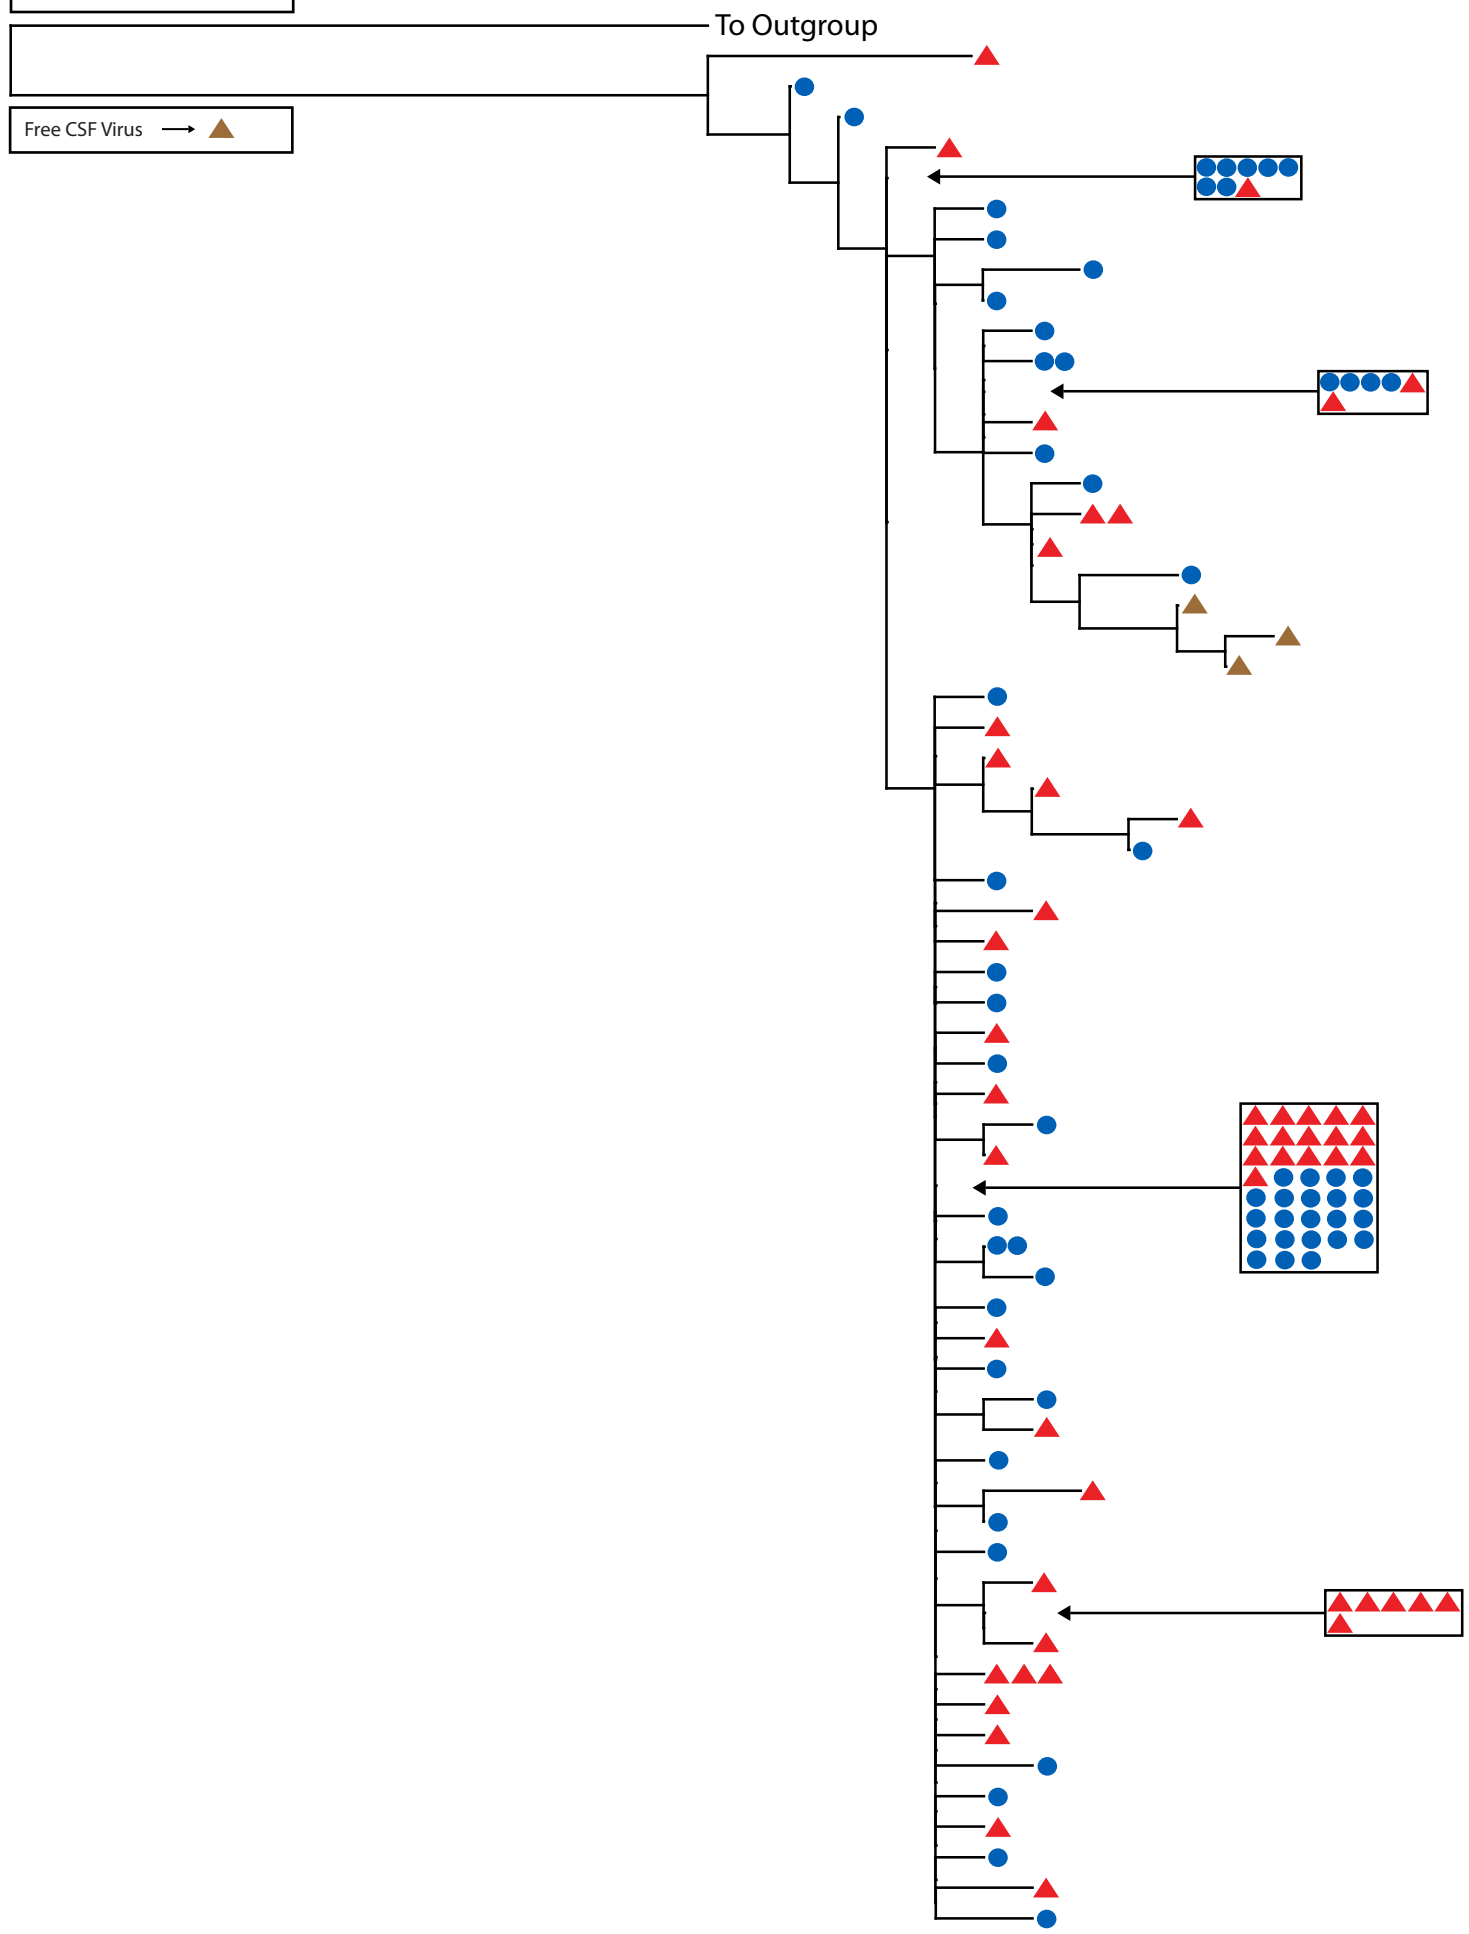

0.01

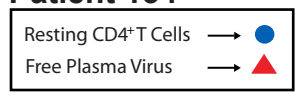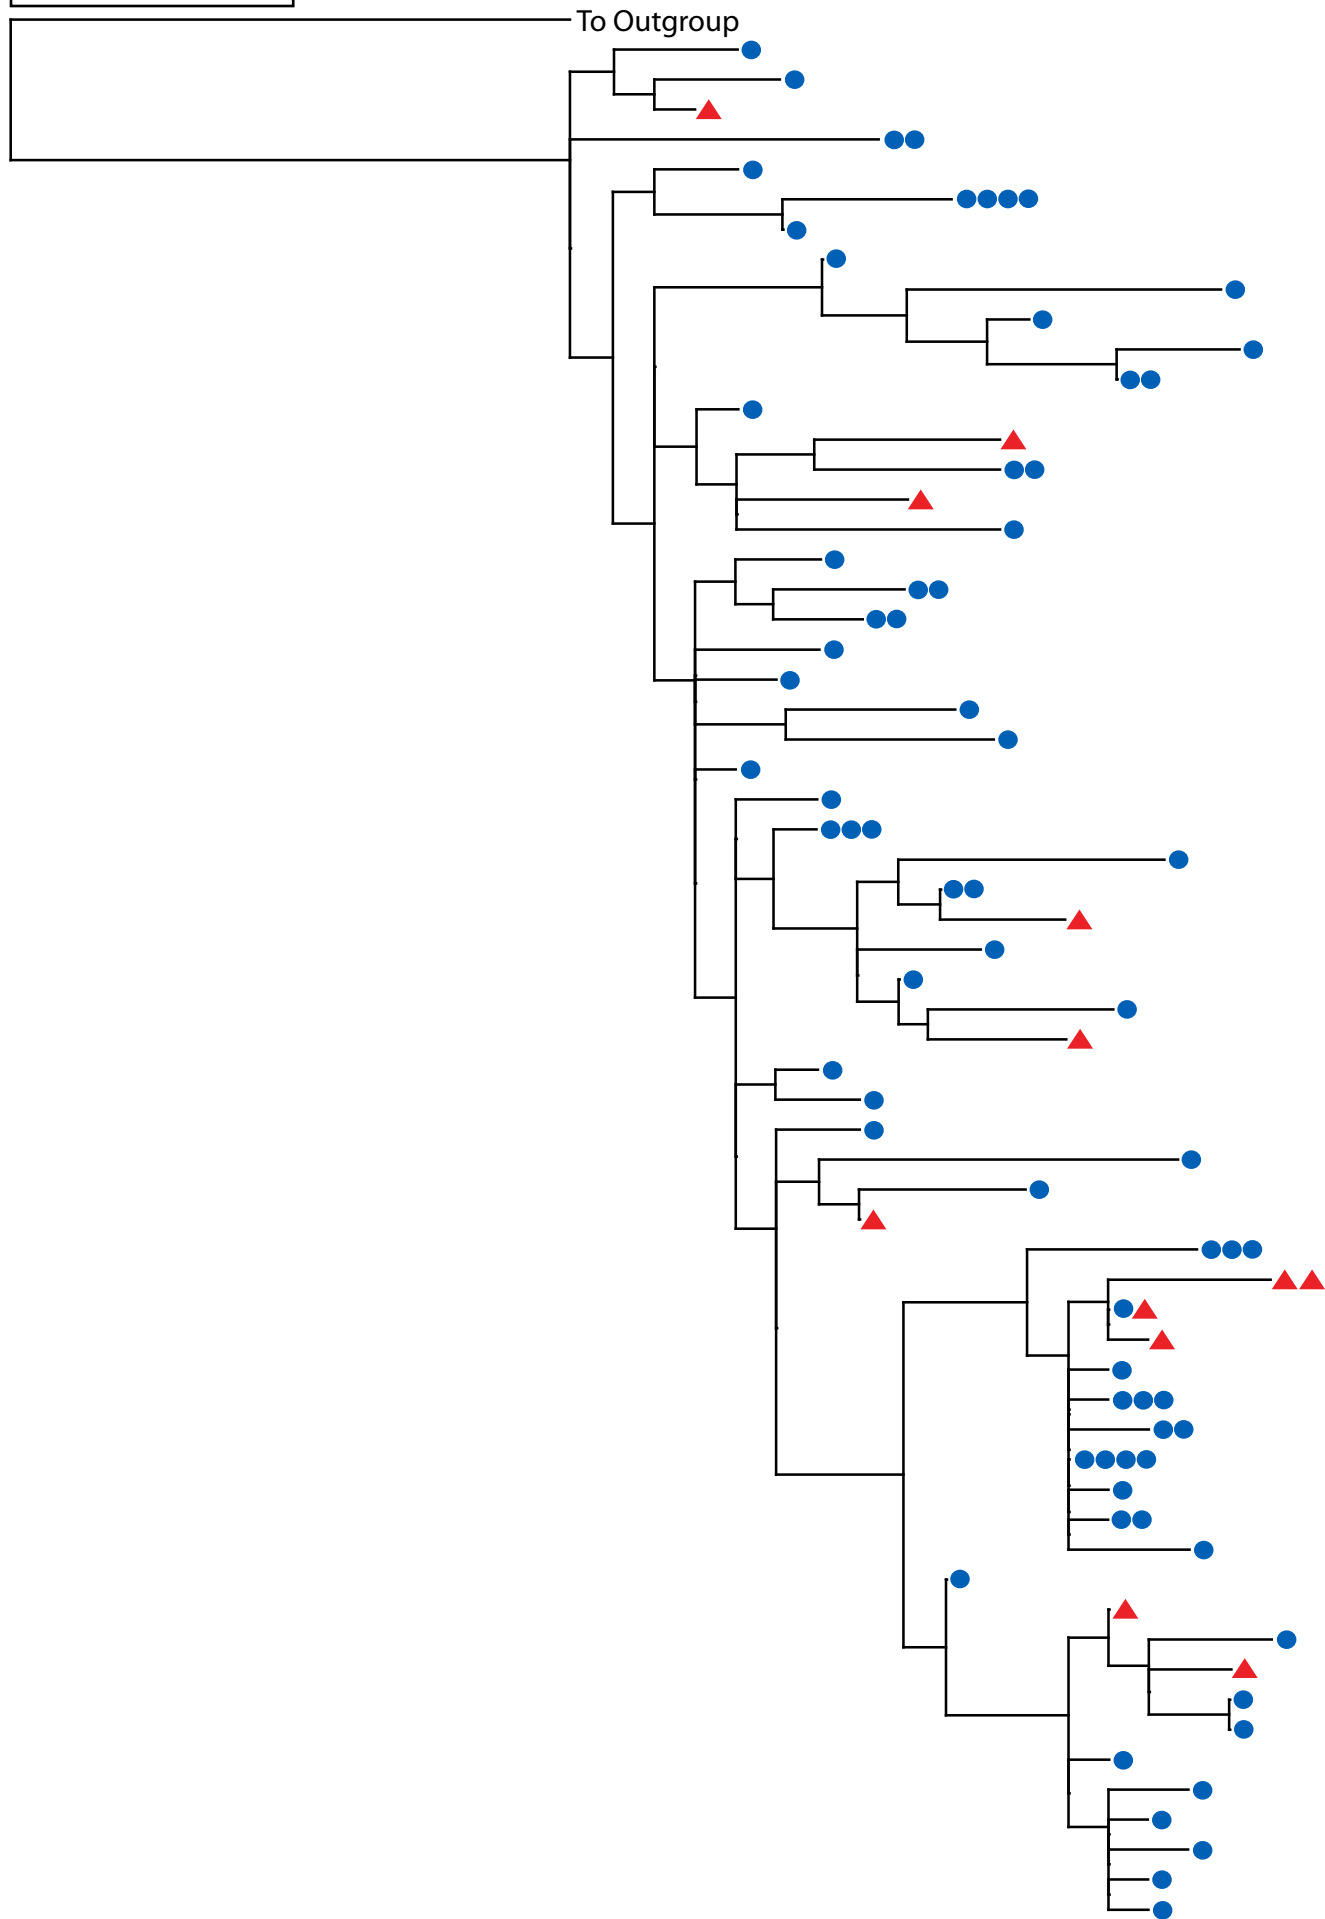

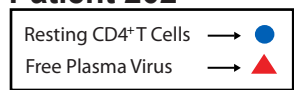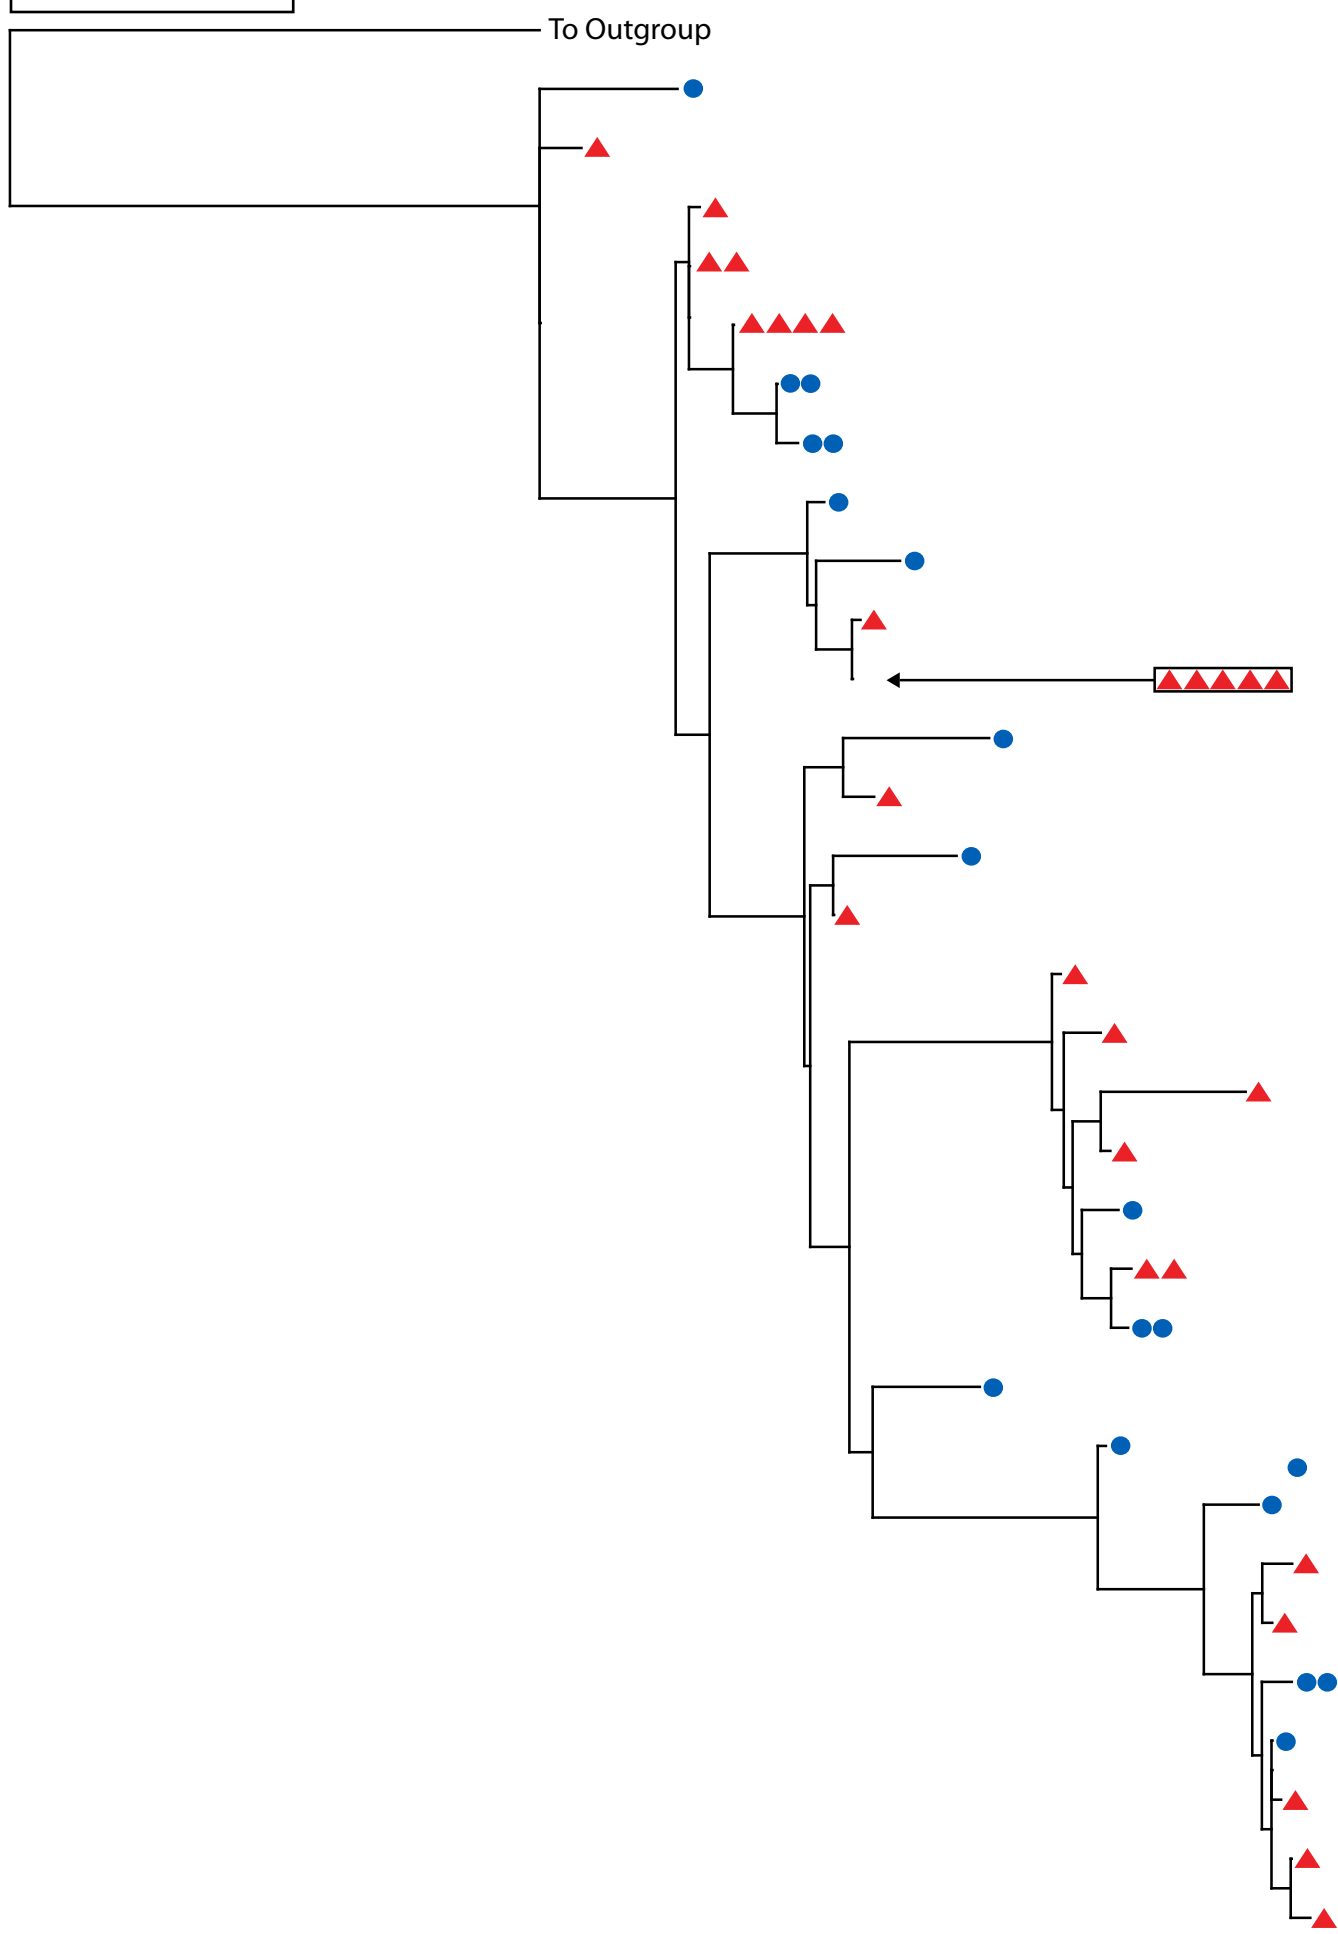



# Patient 113

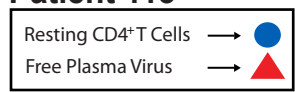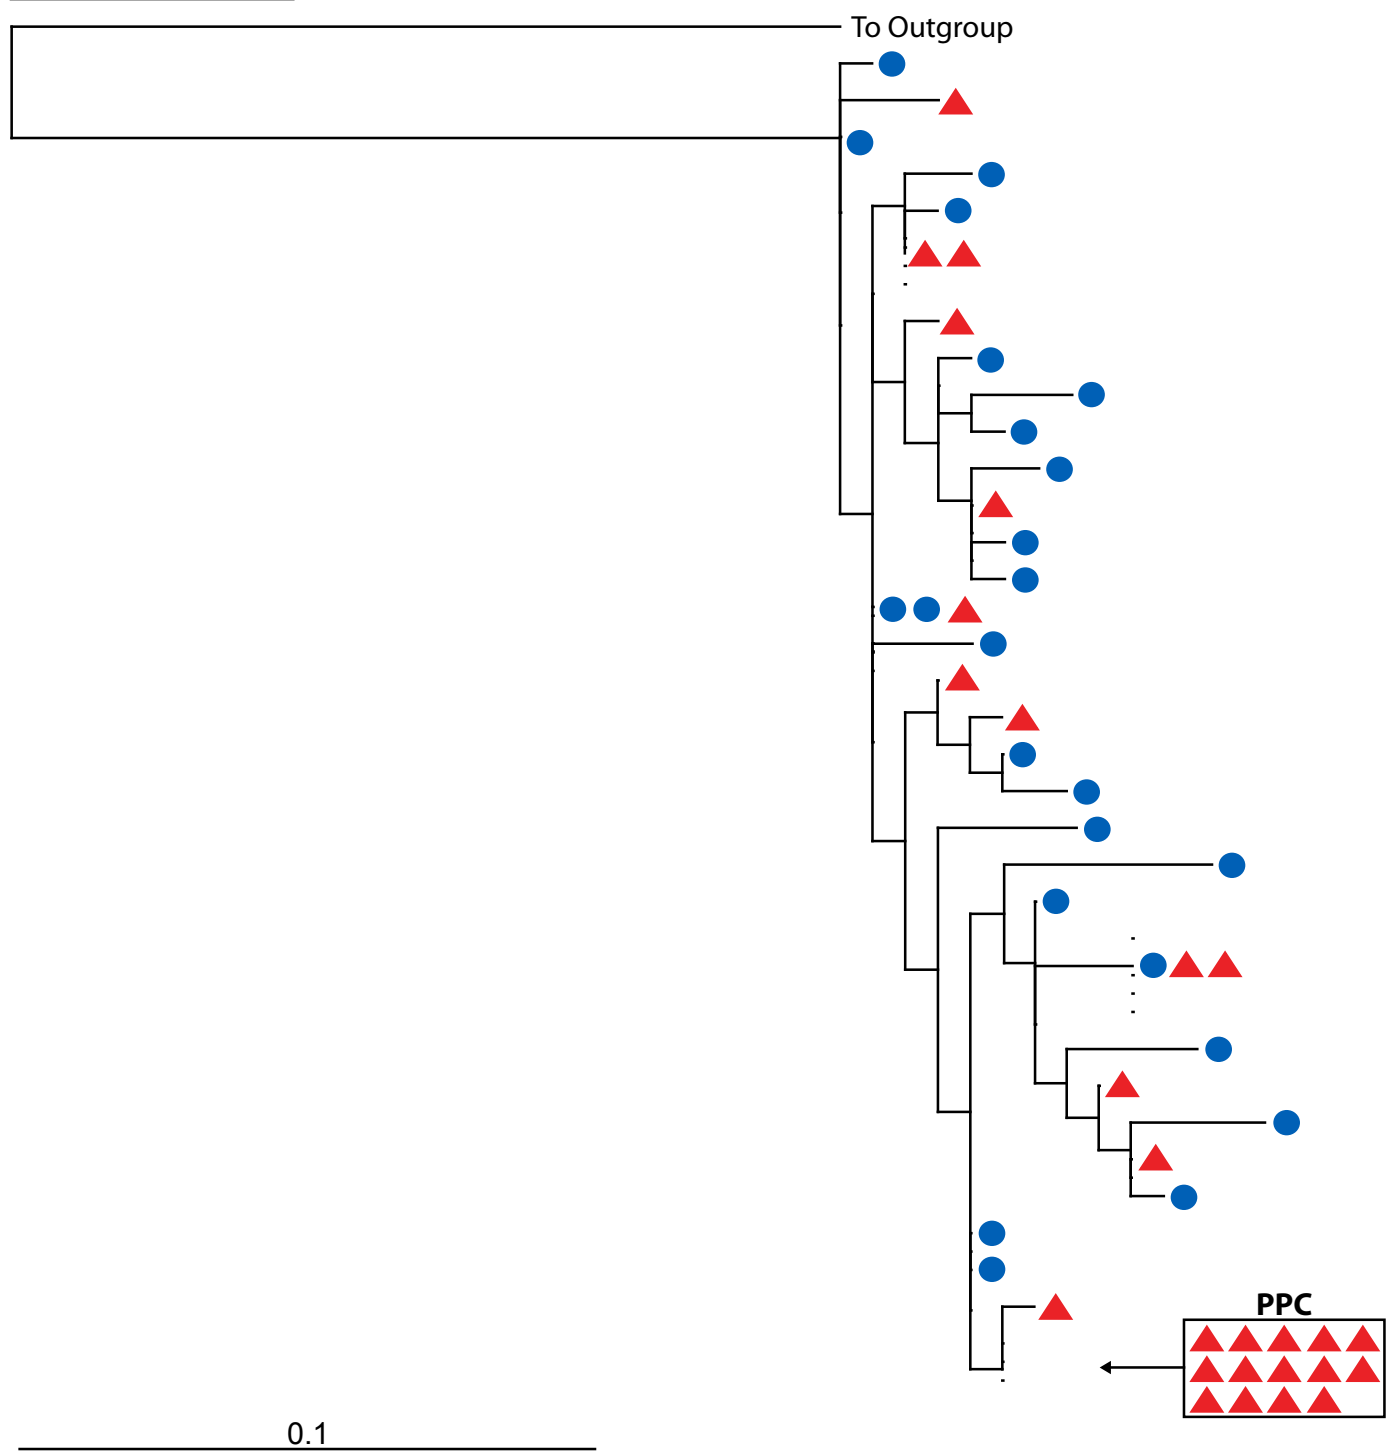

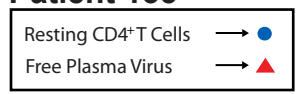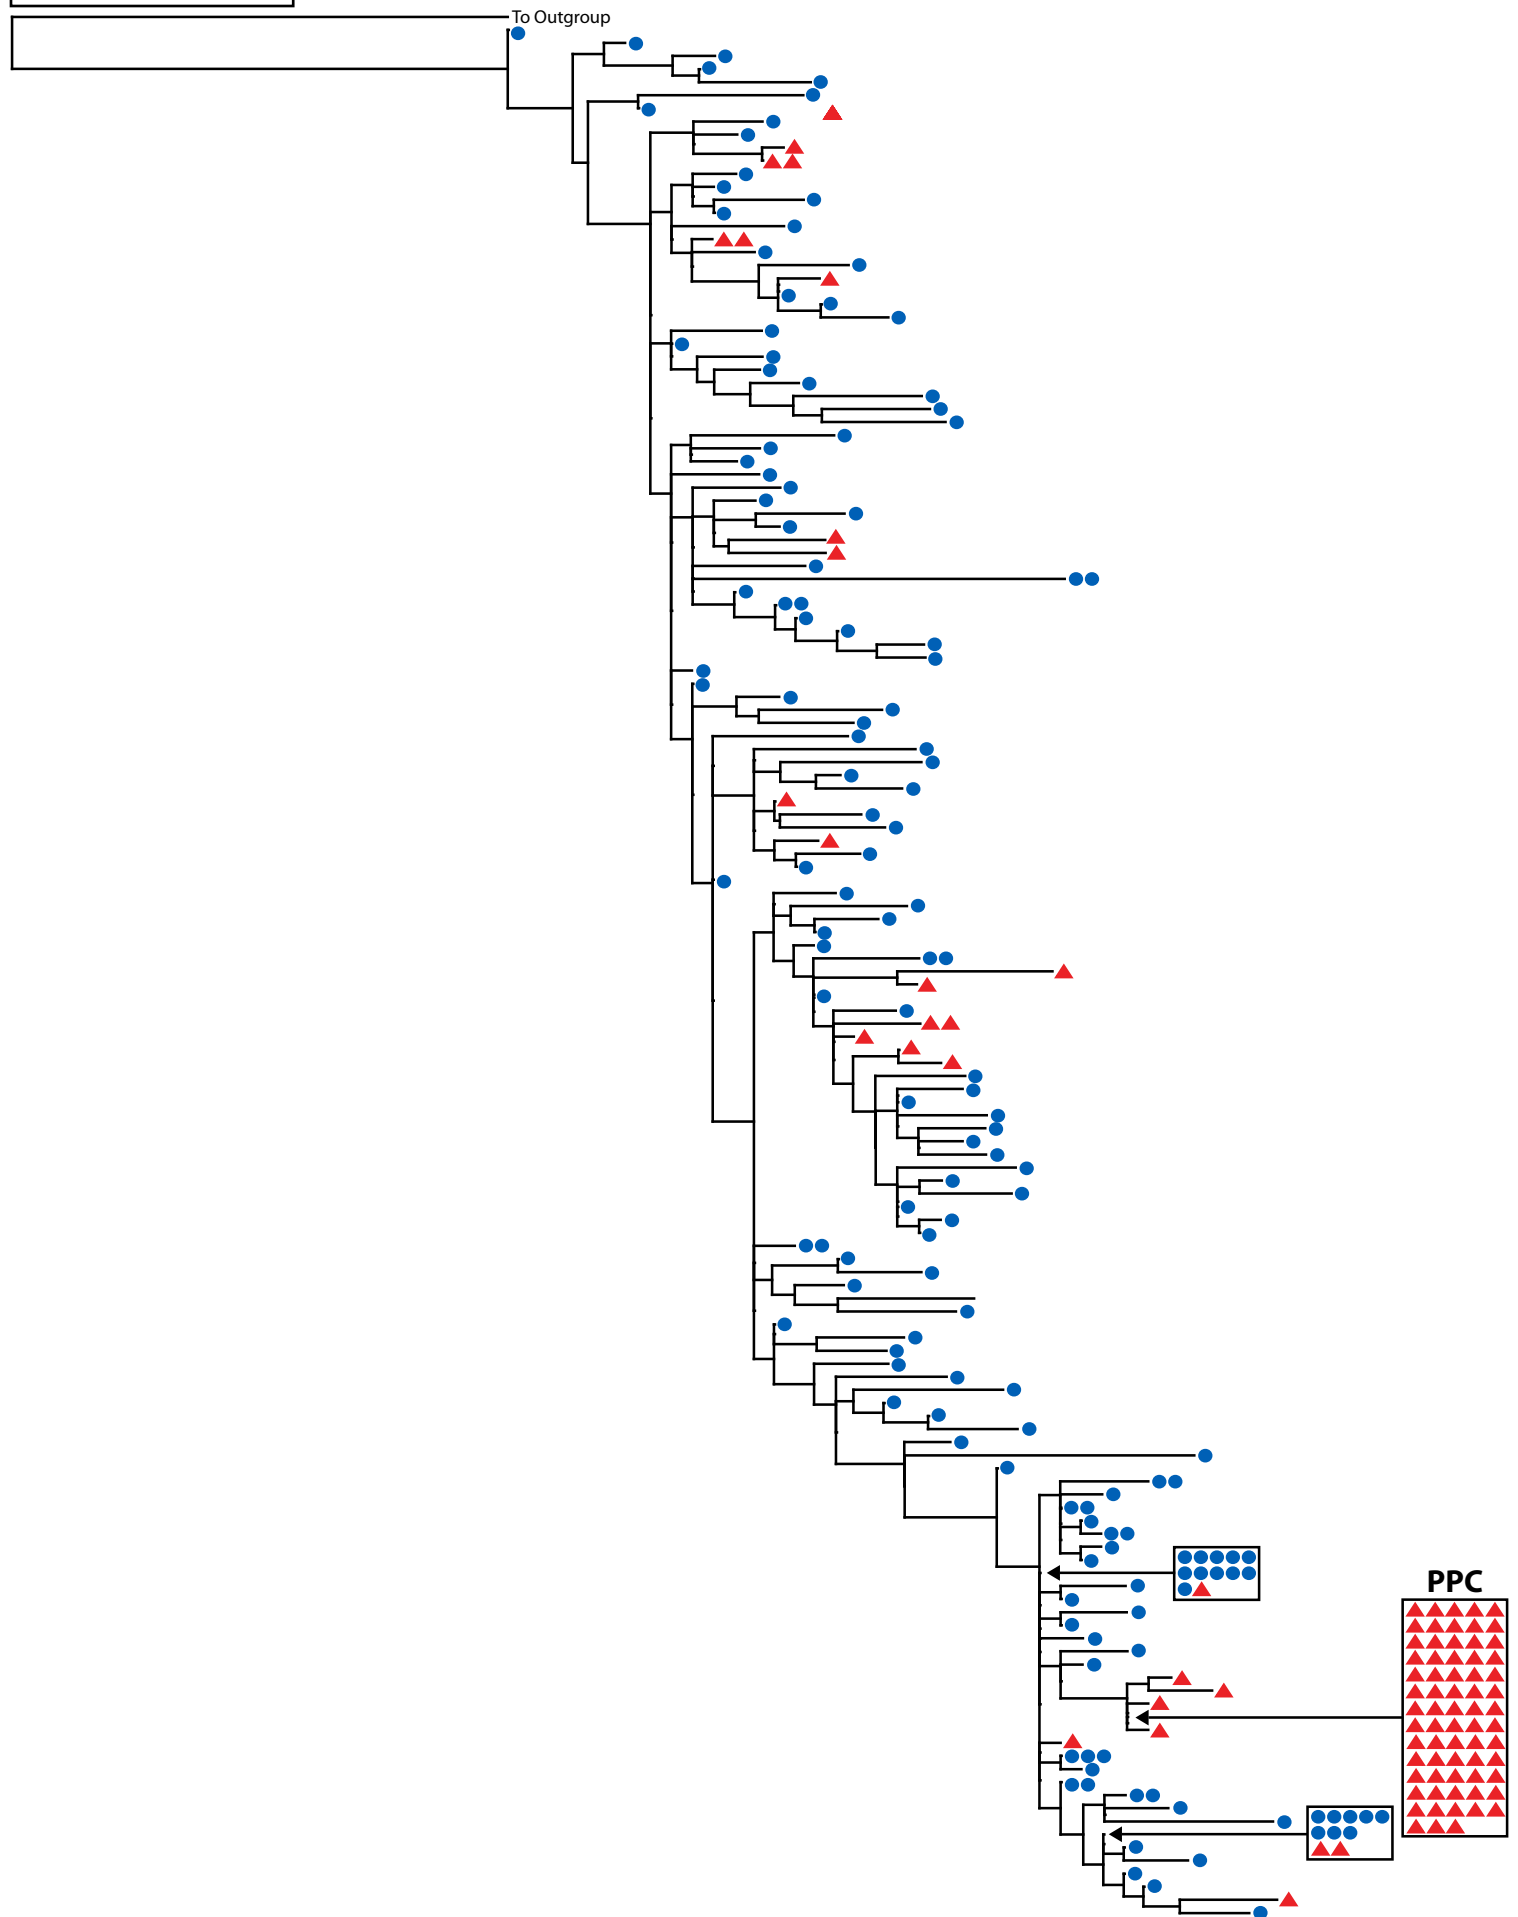

0.1

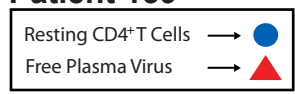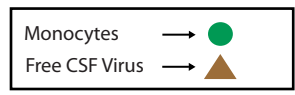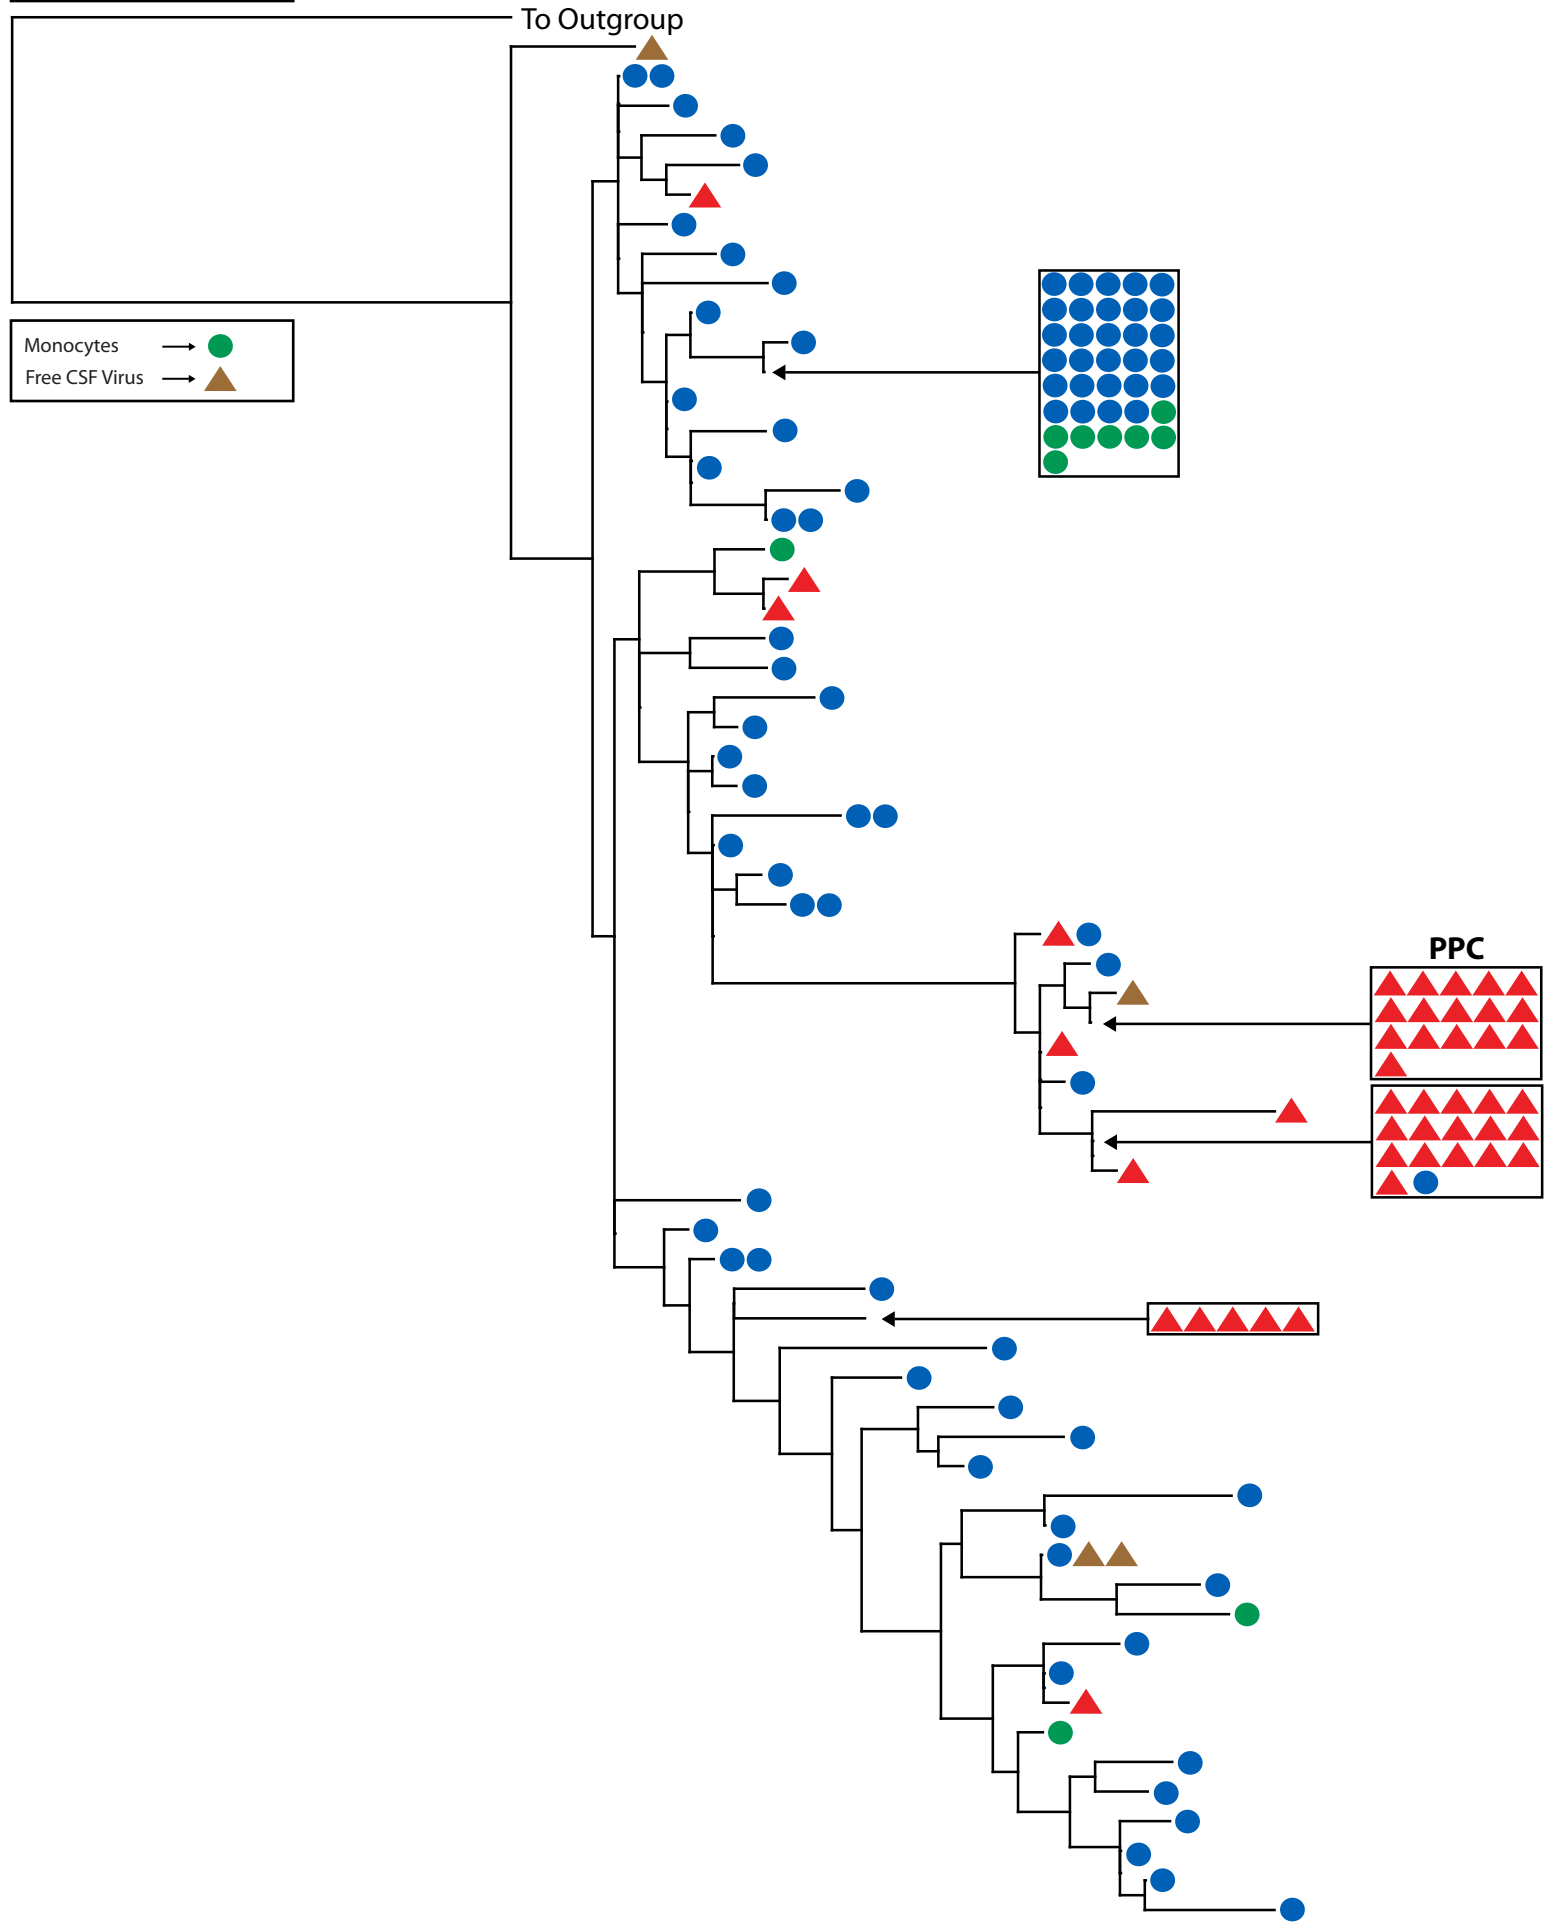

0.1



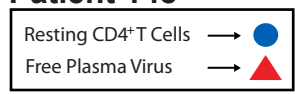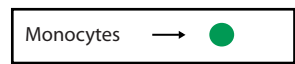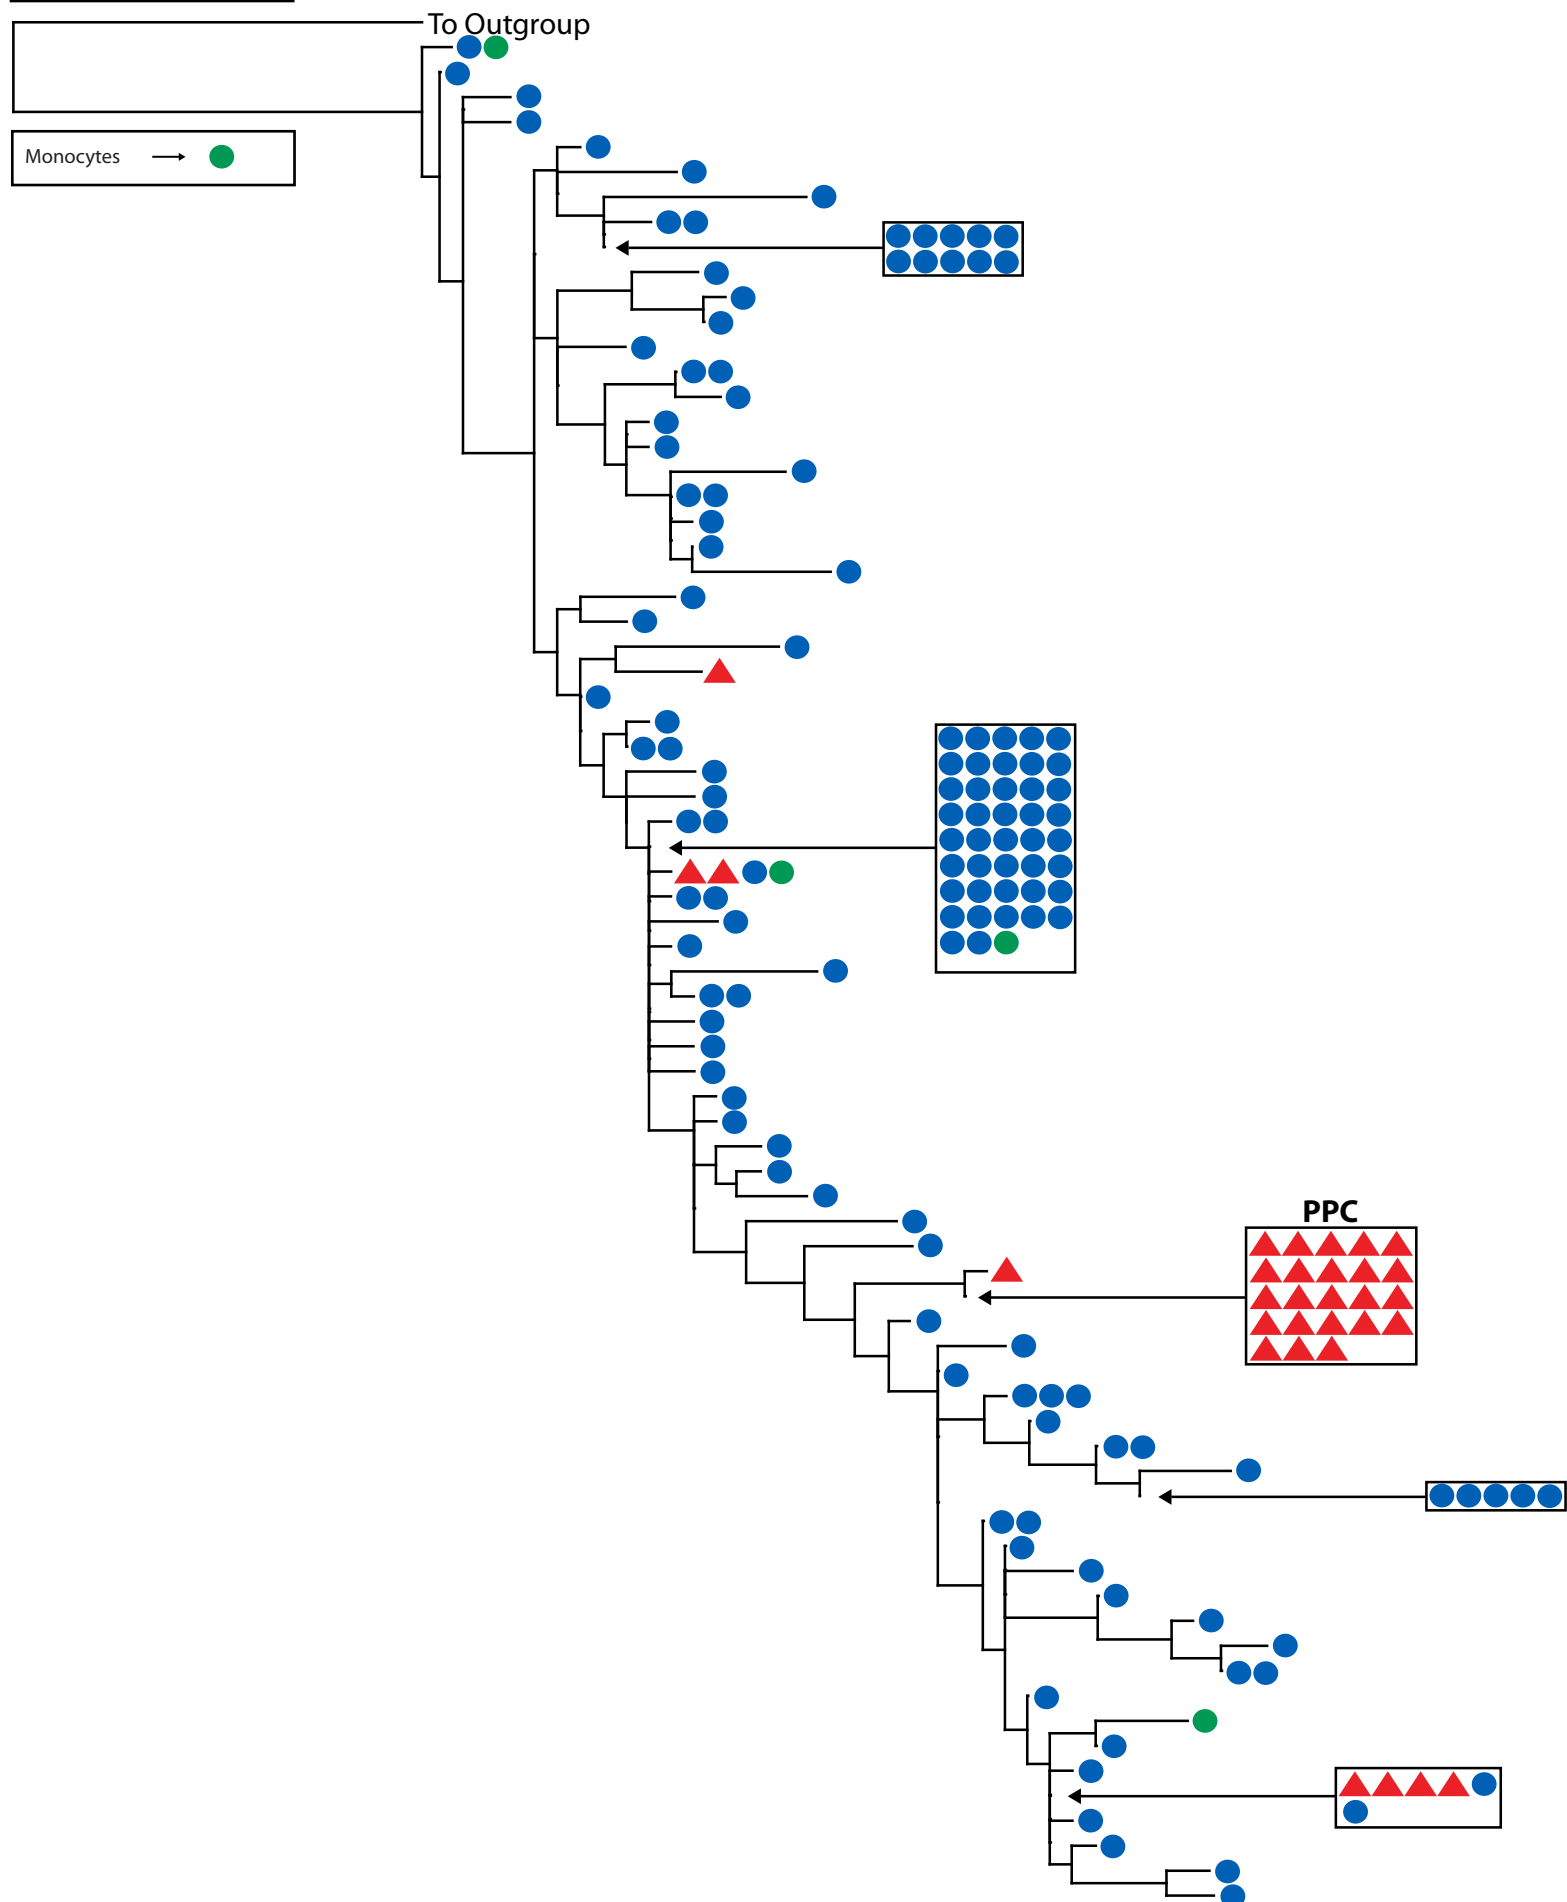

0.1

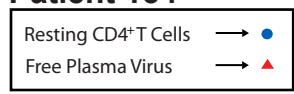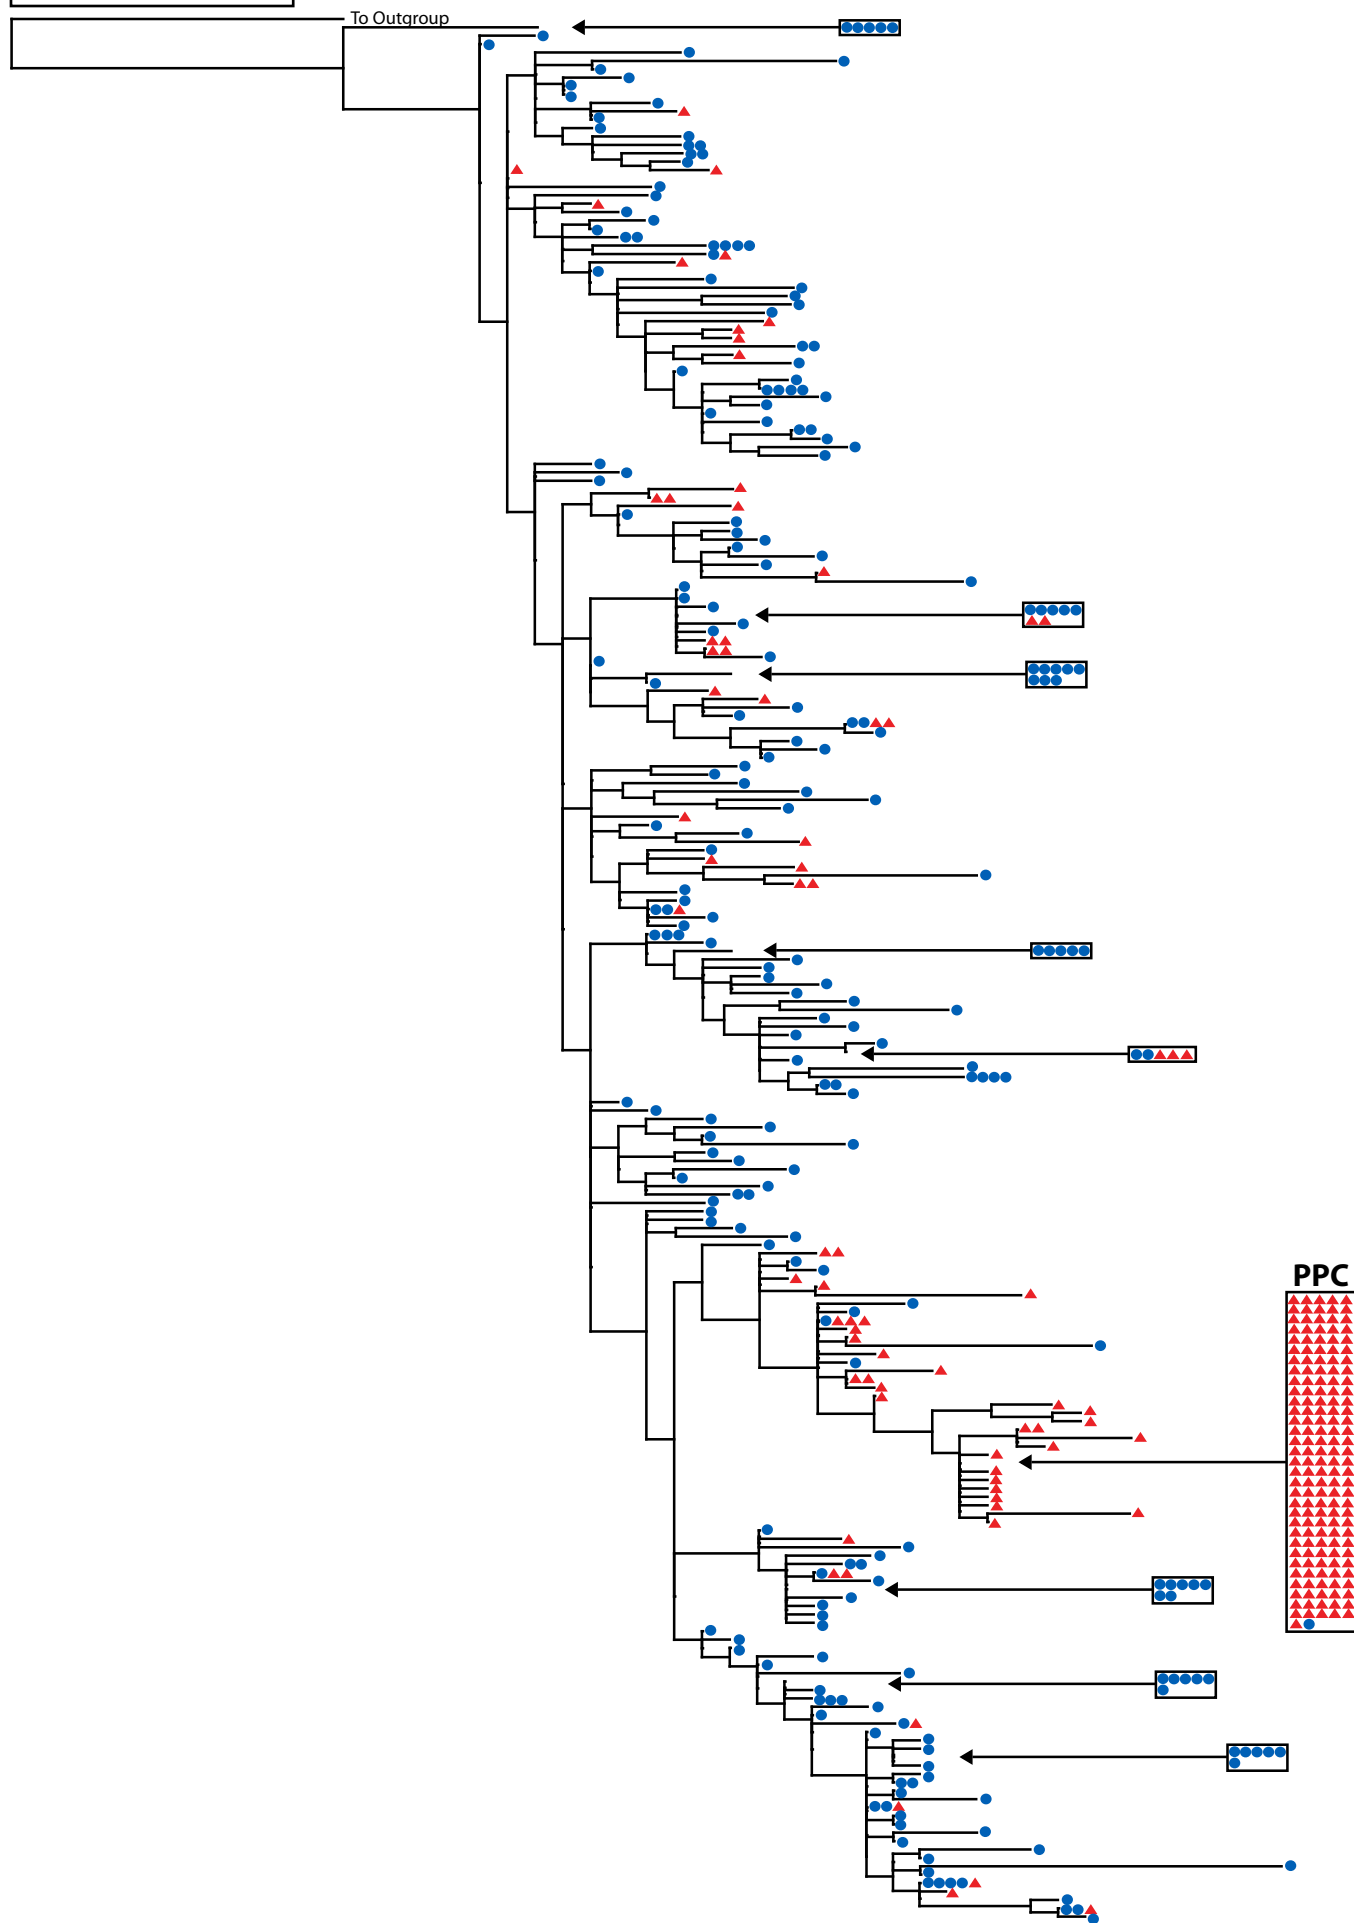

# Patient 154

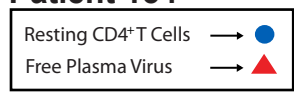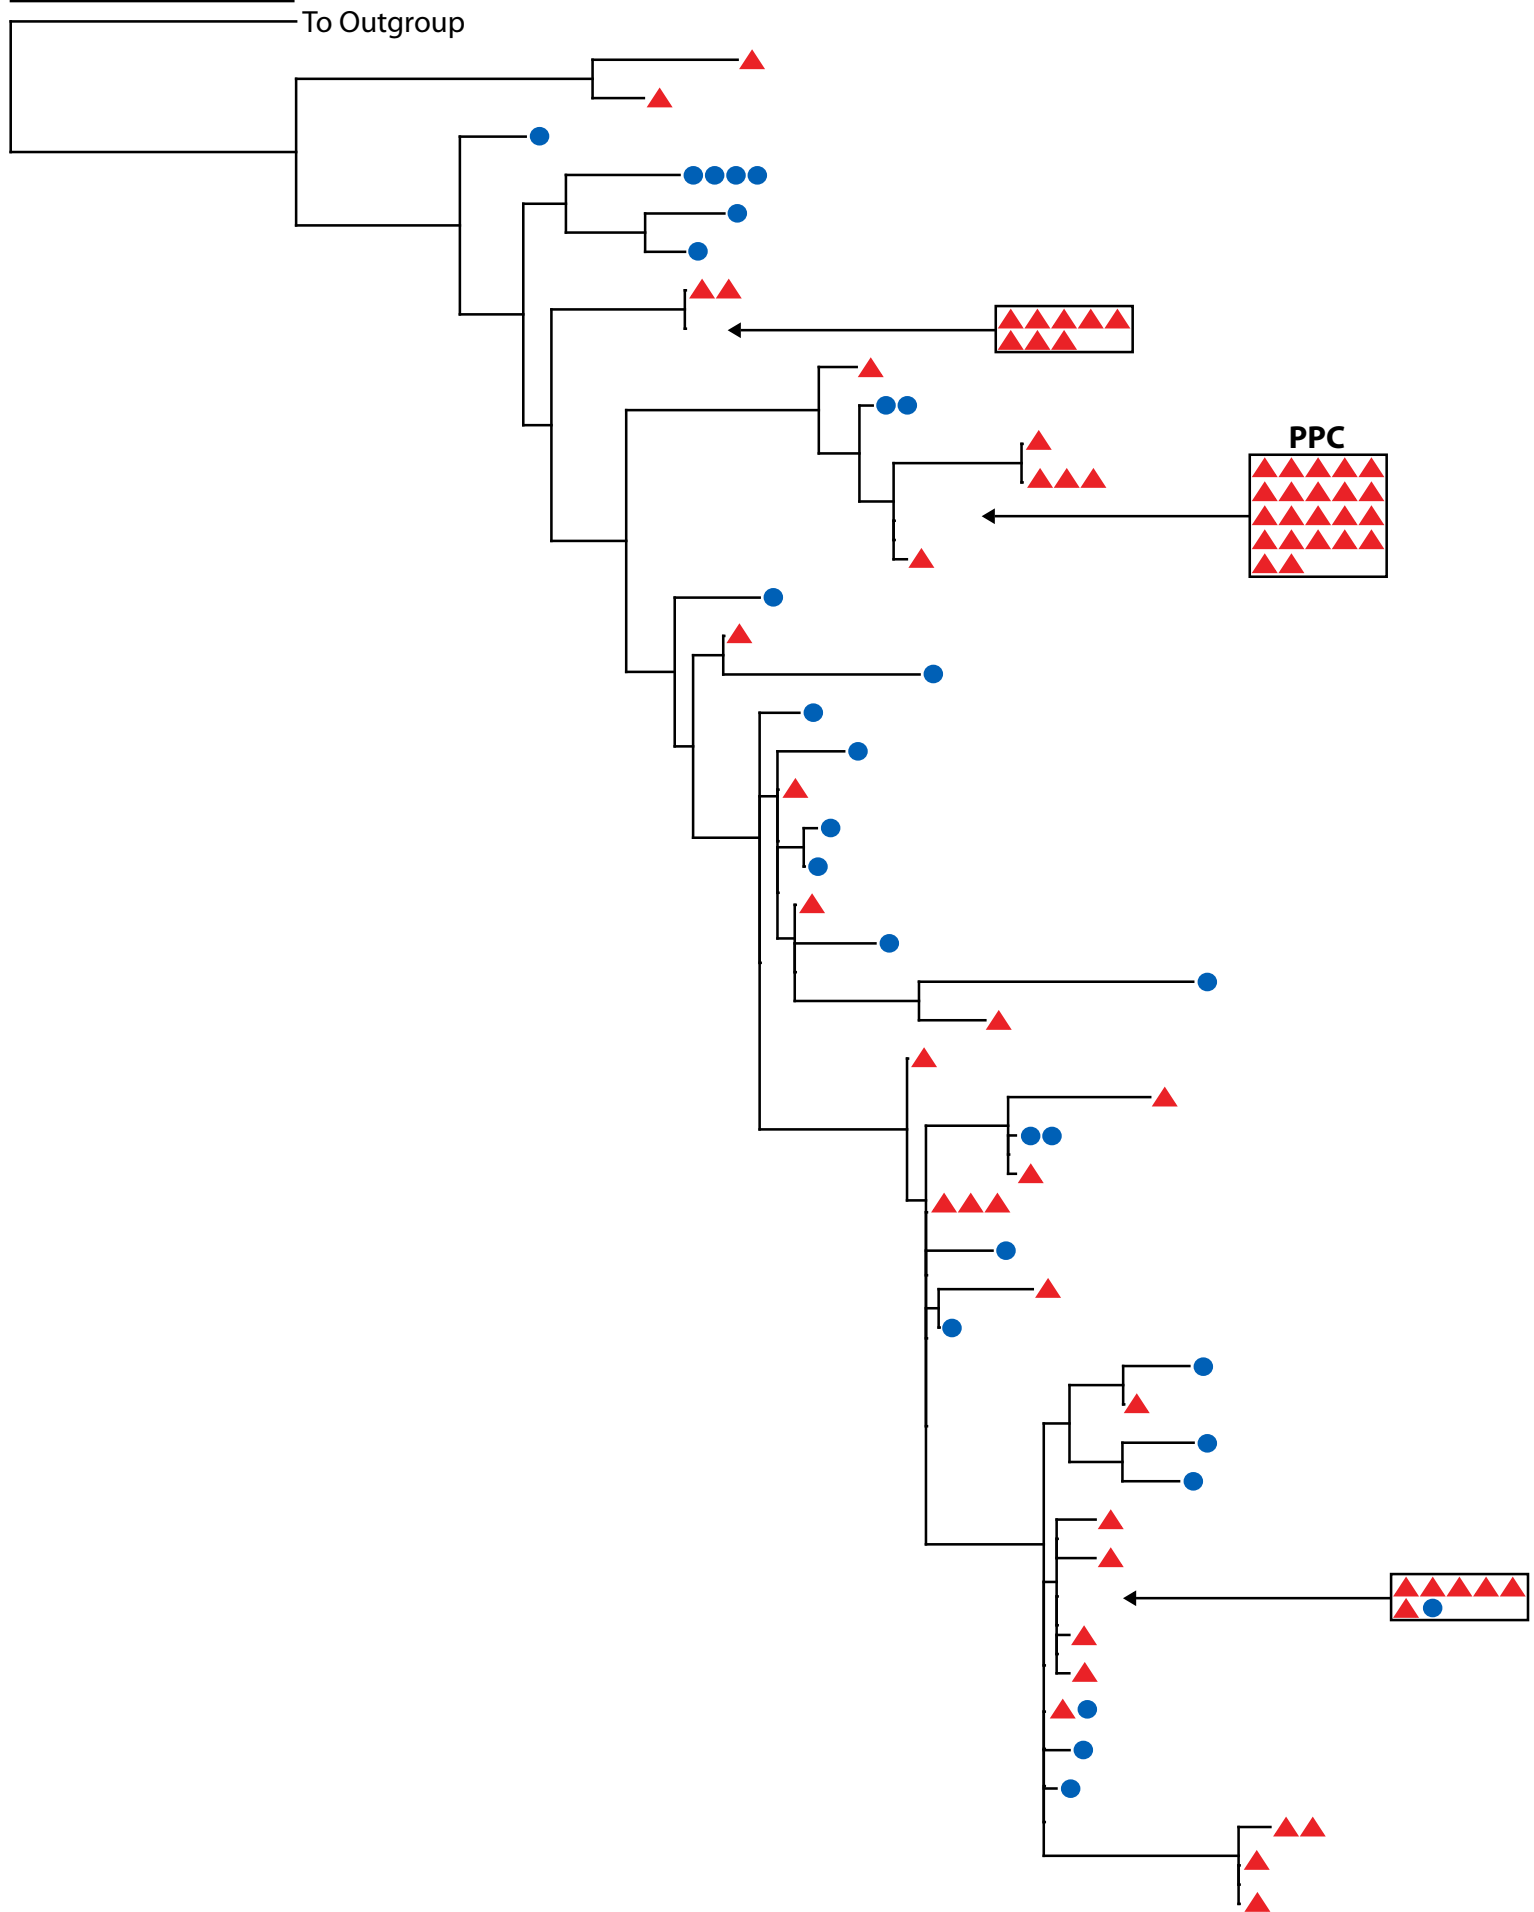

# Patient 154

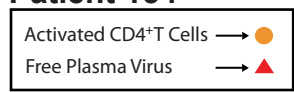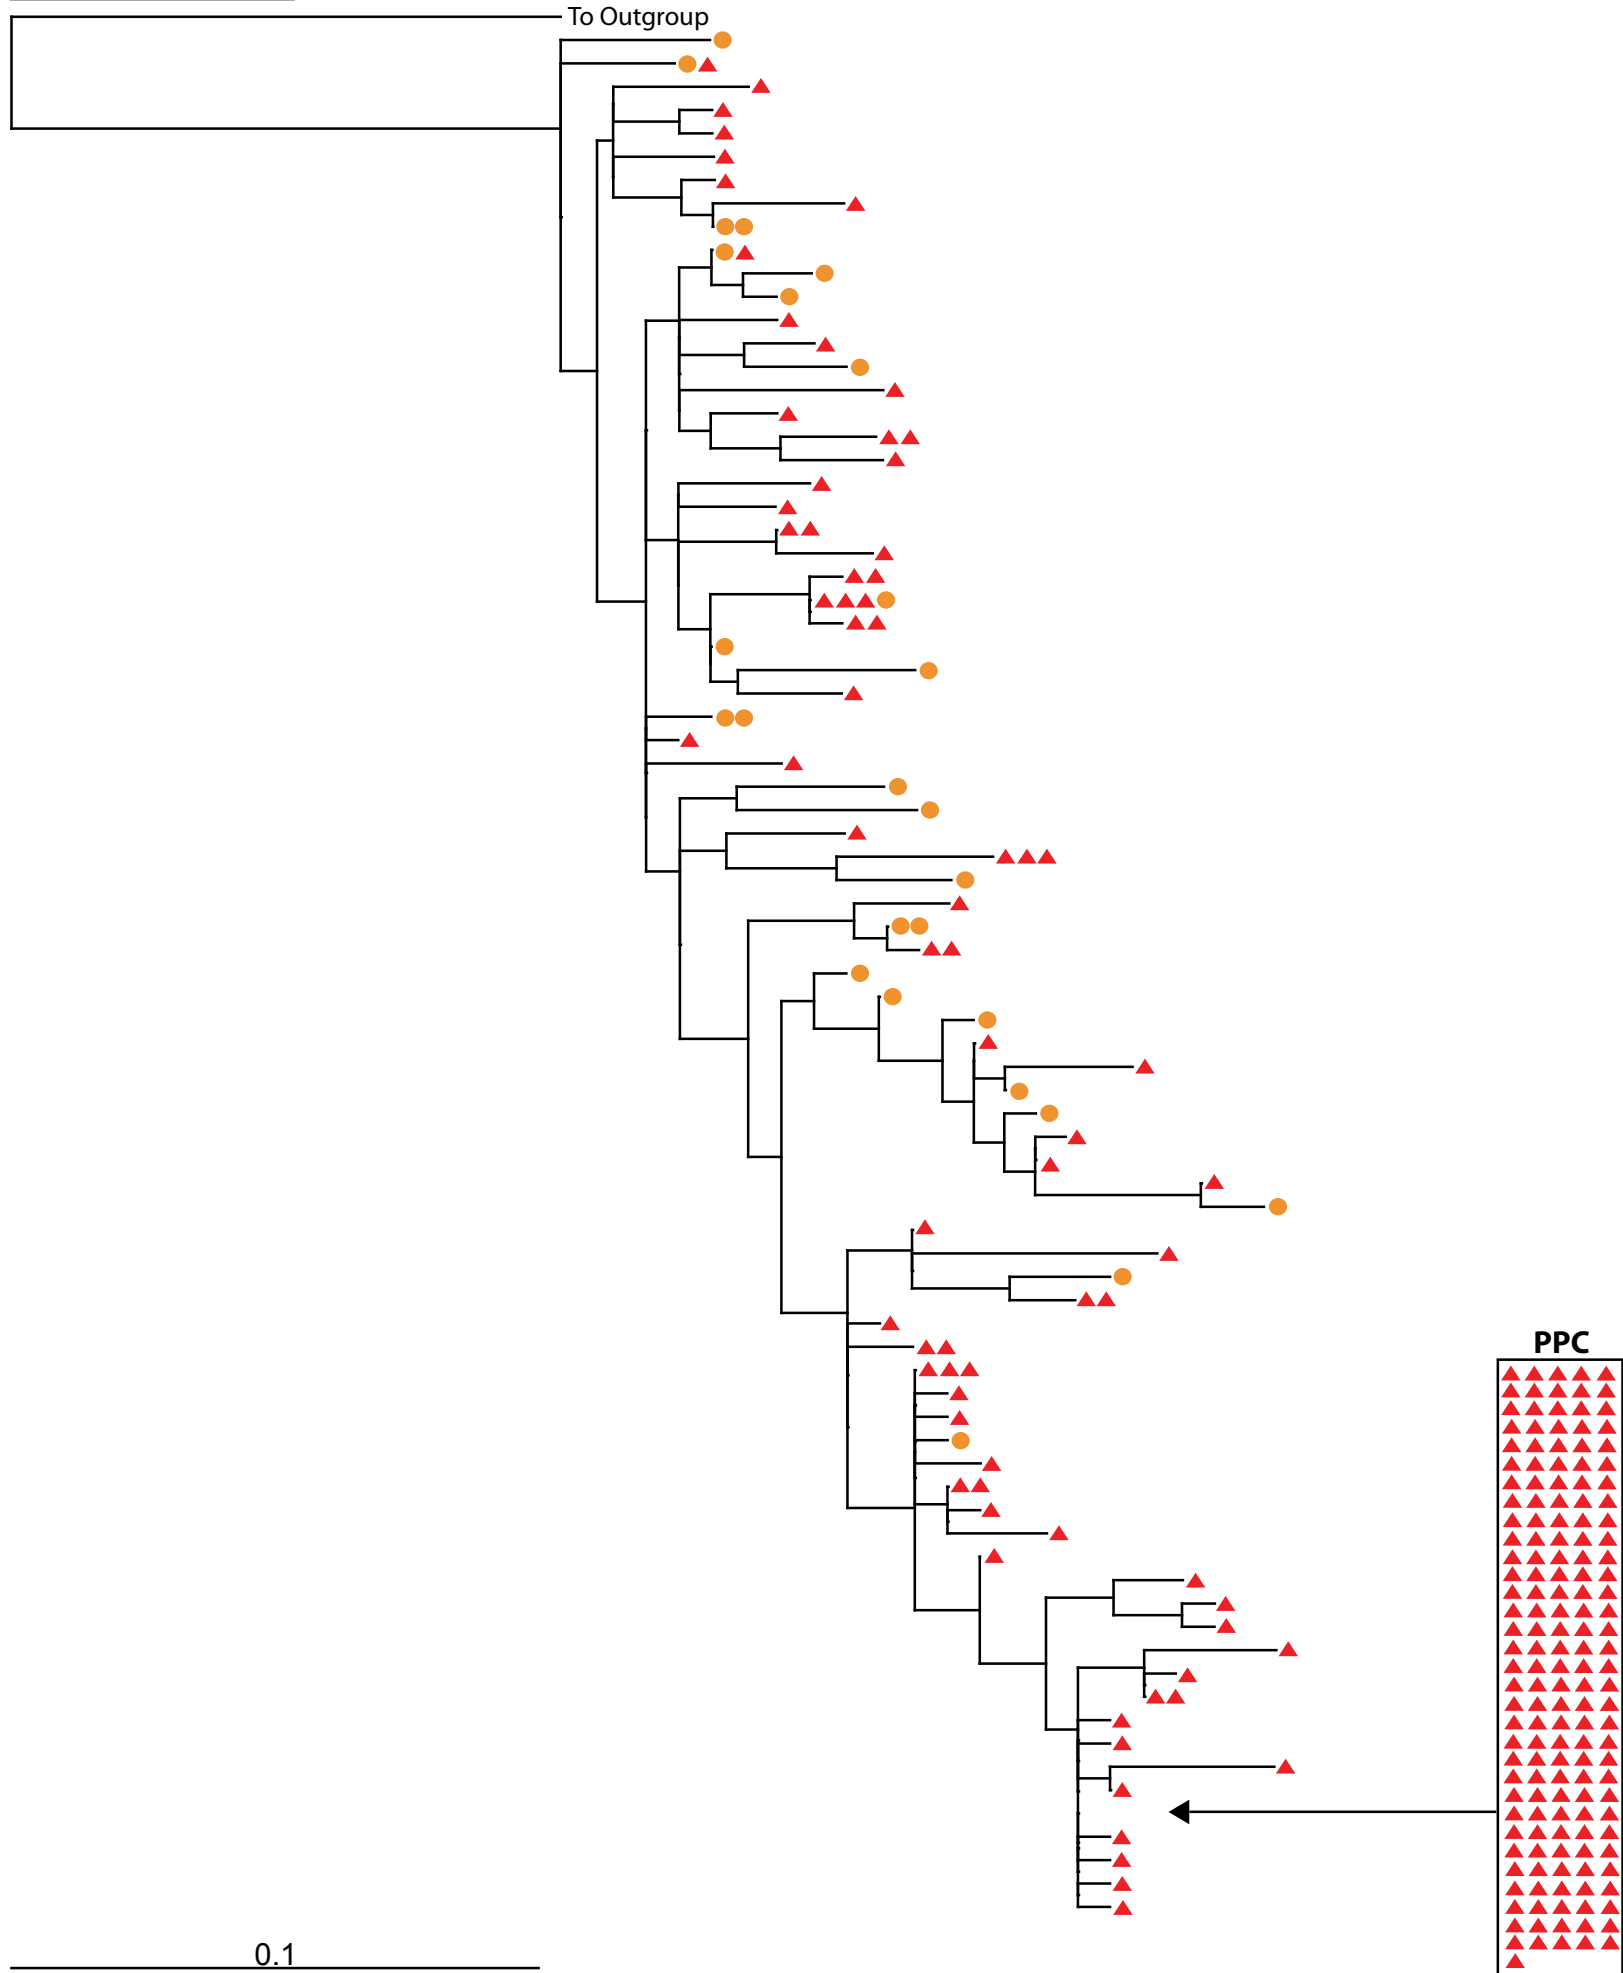

# Patient 154

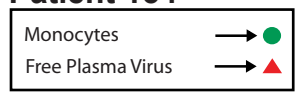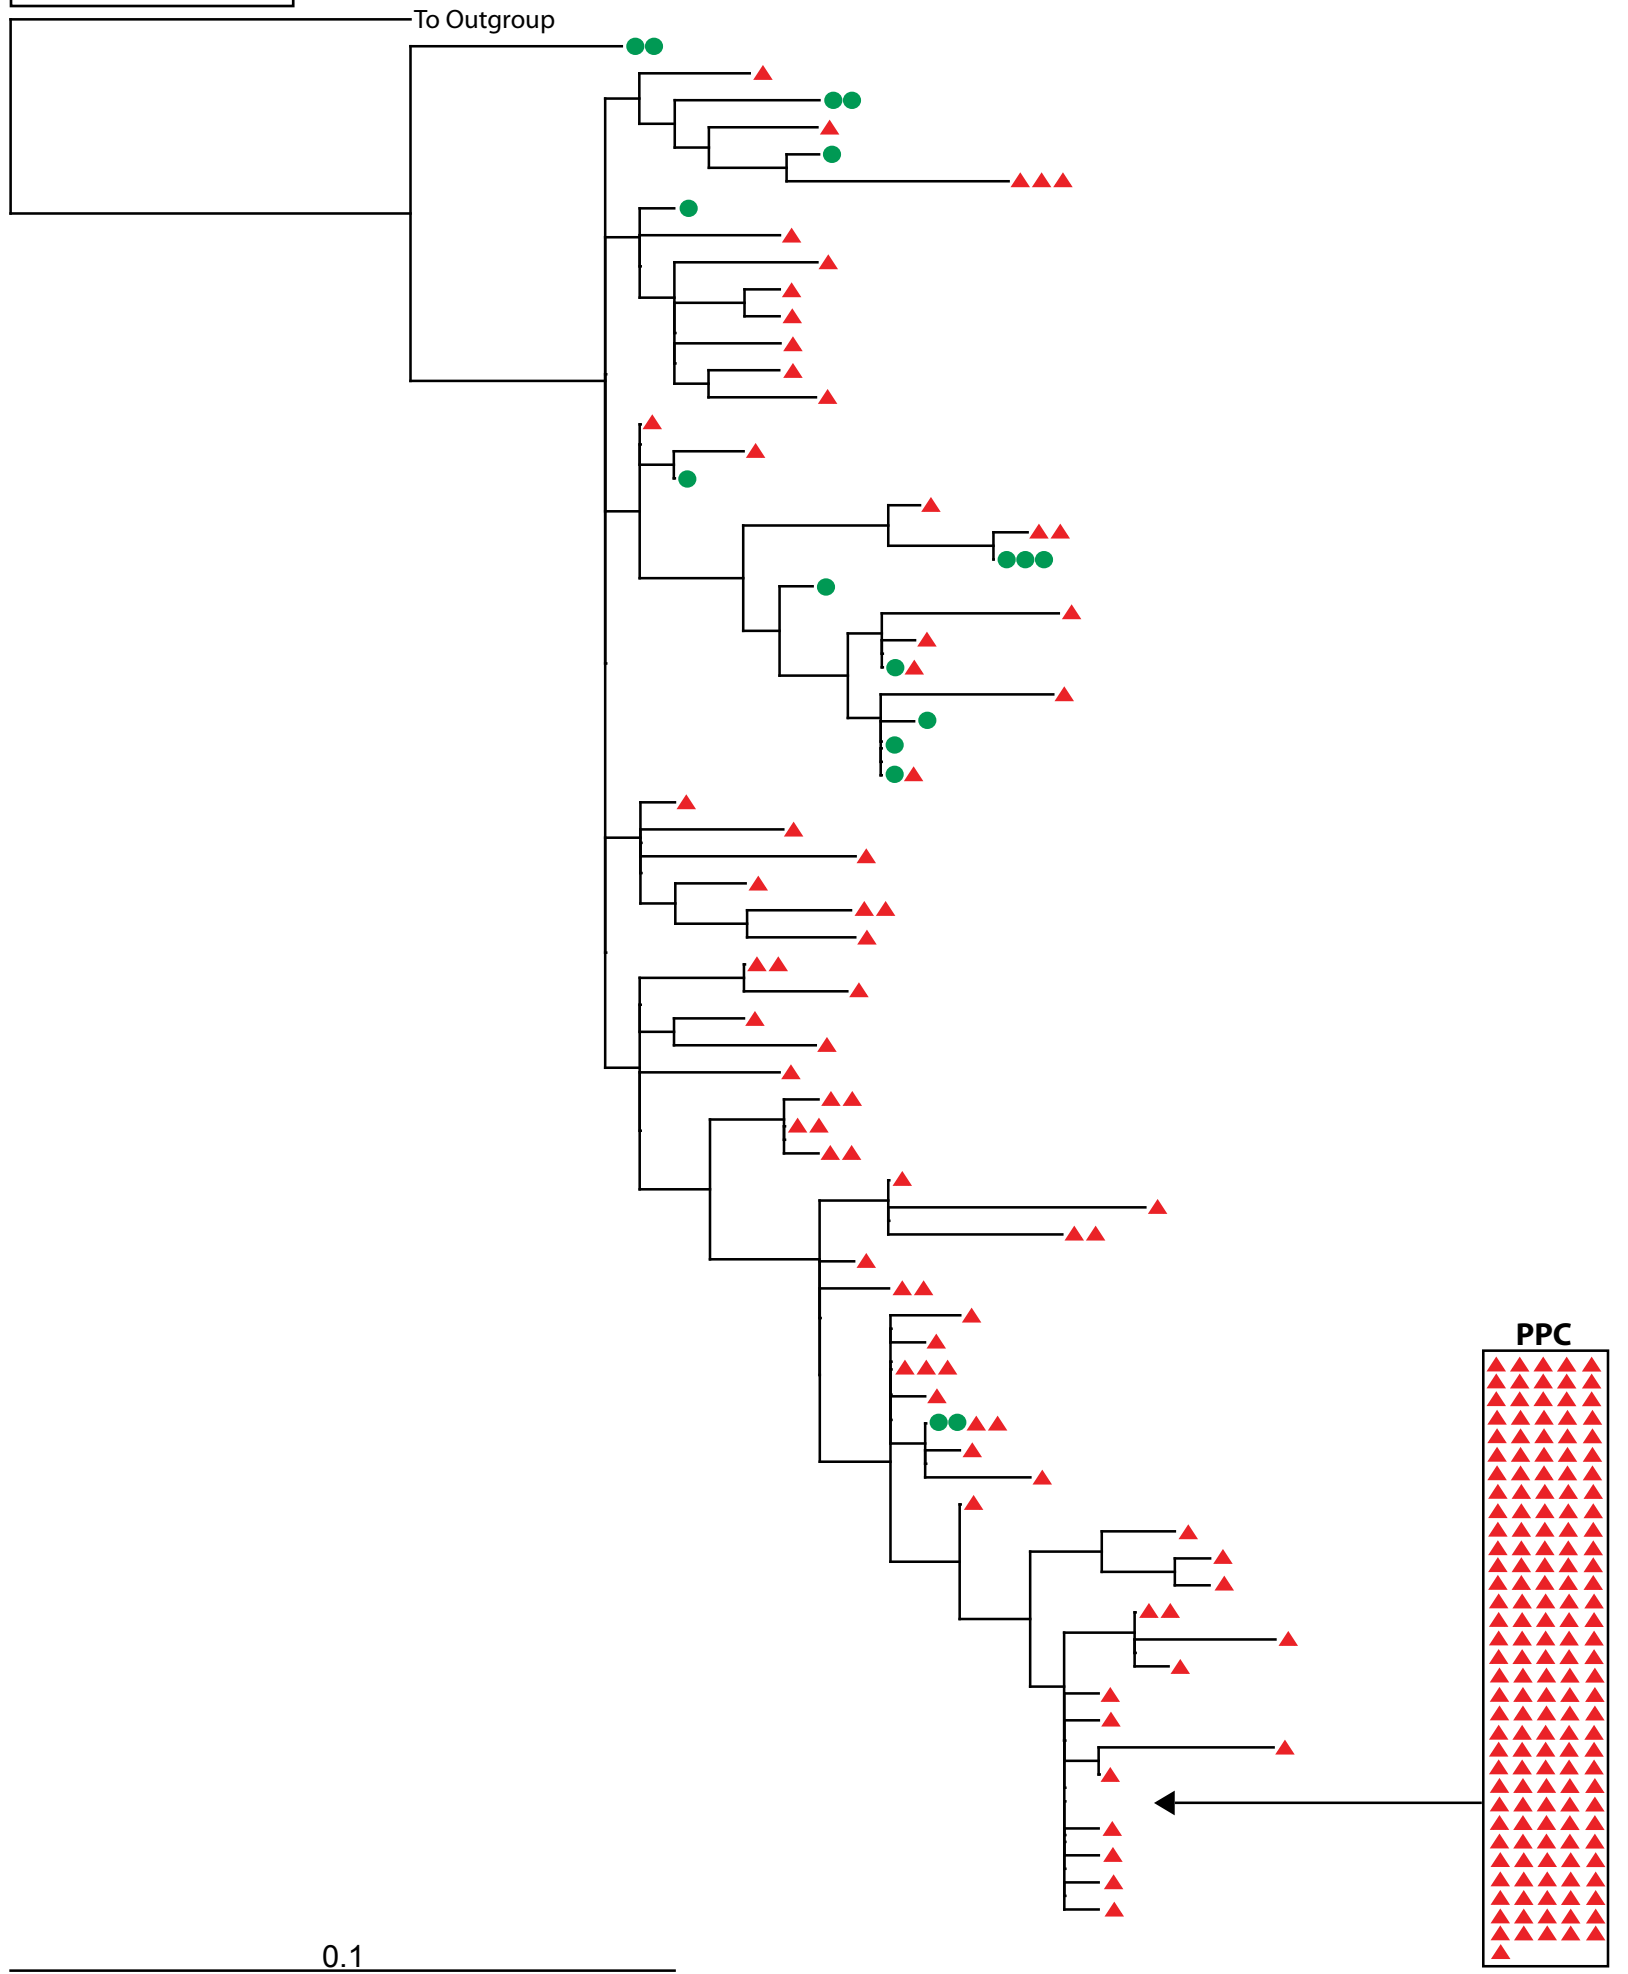

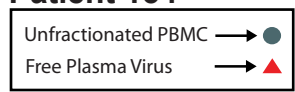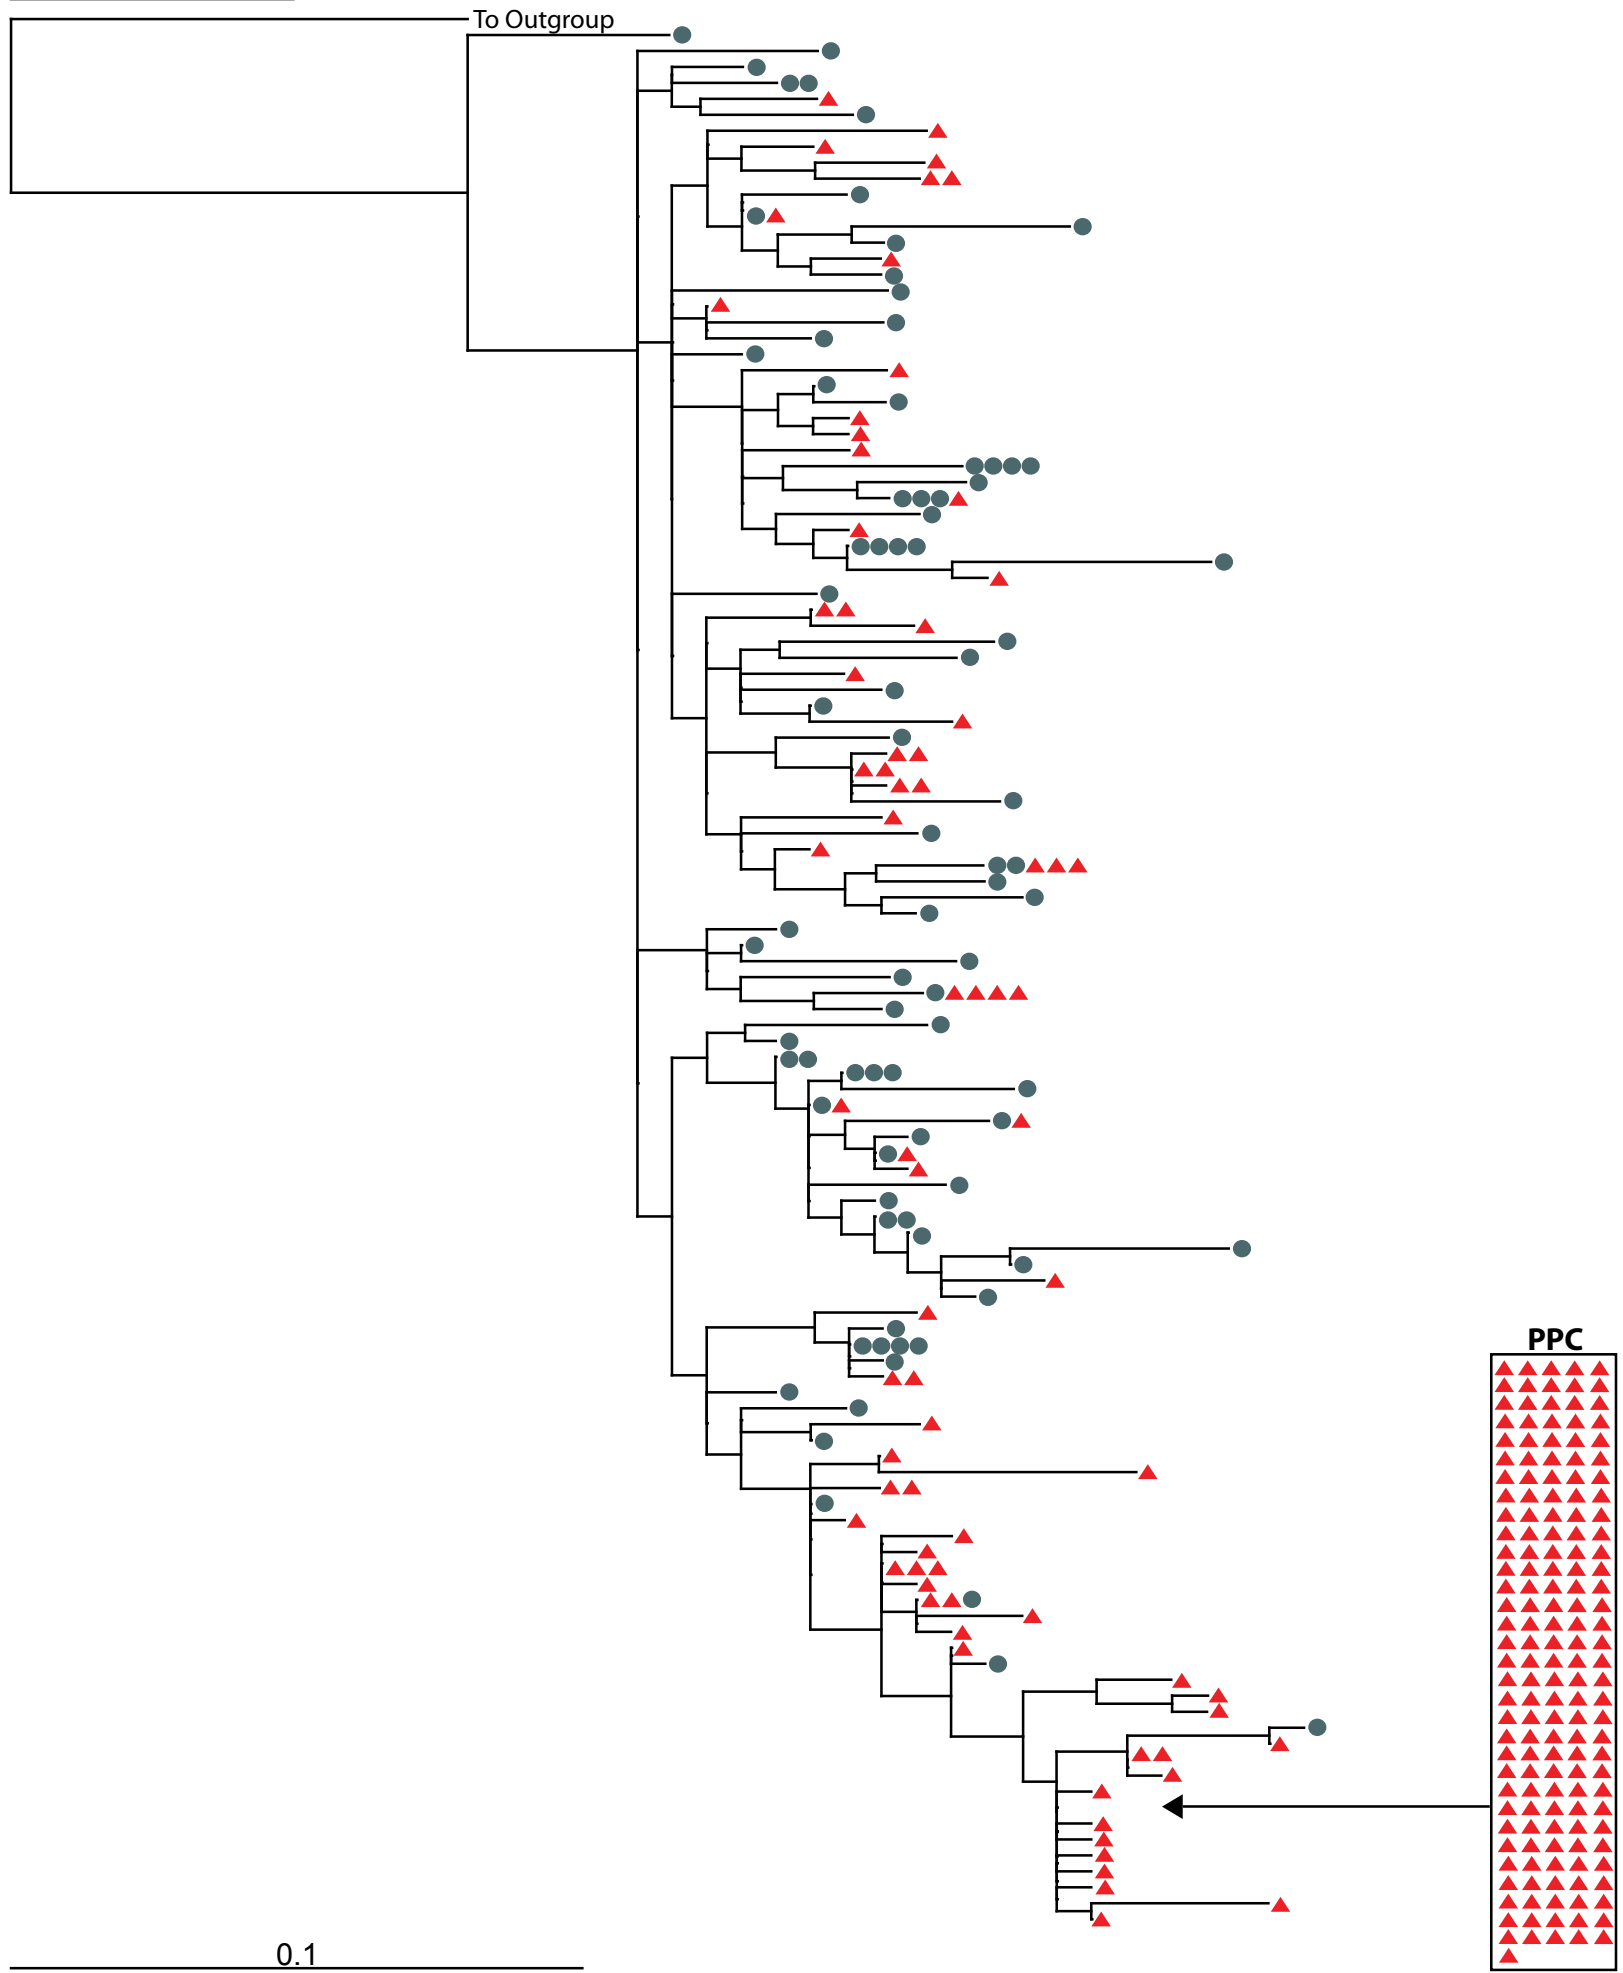

Supplement: supp_83_17_8470__1.pdf [file supp_83_17_8470__1.pdf]
