# Supplementary material
Source: PubMed Central journal article supplement (PMC2738142)
Supplement: supp_83_17_8470__3.pdf [file supp_83_17_8470__3.pdf]

**Supplementary Table 1** Analysis of Population Structure Between Replication Competent Virus and either Free Plasma Virus or Provirus Derived From Resting CD4<sup>+</sup>T Cells

| Patient 154 <sup>a</sup> | Number of Independent Sequences |                |                   |                     | Slatkin-Maddison Analysis   |         |                               |                          | AMOVA Analysis                         |                  |                               | Molecular Diversity ( $\pi$ ) |                                     |
|--------------------------|---------------------------------|----------------|-------------------|---------------------|-----------------------------|---------|-------------------------------|--------------------------|----------------------------------------|------------------|-------------------------------|-------------------------------|-------------------------------------|
|                          | Replication Competent Virus vs  | Gene Amplified | Free Plasma Virus | Integrated Provirus | Replication Competent Virus | p-value | Adjusted p-value <sup>d</sup> | Migration Events (ML/BI) | % Variation Among / Within Populations | Adjusted p-value | Adjusted p-value <sup>d</sup> | Replication Competent Virus   | Plasma Virus or Integrated Provirus |
| Free Plasma Virus        | RT                              | 238            | 0                 | 19                  | 0.024                       | 0.029   | 17/17                         | 42.89                    | 0.000                                  | 0.000            | 0.023                         | 0.011                         |                                     |
| Integrated Provirus      | RT                              | 0              | 223               | 19                  | 0.063                       | 0.069   | 17/17                         | 1.75                     | 0.051                                  | 0.069            | 0.023                         | 0.020                         |                                     |

<sup>a</sup> Patient sequences derived from Bailey *et al.* (1).

<sup>b</sup> ML indicates phylogenetic trees were generated via a classical maximum likelihood approach.

<sup>c</sup> BI indicates phylogenetic trees were generated via a Bayesian inference approach.

<sup>d</sup> p-values obtained for both the Slatkin-Maddison tests as well as the AMOVA tests were subjected to Benjamini-Hochberg false discovery rate corrections, treating p-values obtained using the ML approach separately from those obtained using BI, and both separately from the AMOVA tests (2).
