# Supplementary material
Source: PubMed Central journal article supplement (PMC2738142)
Supplement: supp_83_17_8470__4.pdf [file supp_83_17_8470__4.pdf]

**Supplementary Table 2** Summary of Patient Characteristics

| Patient          | CD4 <sup>+</sup> T Cell Count<br>at Study Entry<br>(Cells/ $\mu$ L) | Plasma HIV RNA<br>at Study Entry<br>(copies/mL) <sup>a</sup> | HAART Regimen<br>at Study Entry <sup>b</sup> | Duration of<br>Treatment<br>(Years) |
|------------------|---------------------------------------------------------------------|--------------------------------------------------------------|----------------------------------------------|-------------------------------------|
| 1 <sup>c</sup>   | 1220                                                                | <50                                                          | AZT, 3TC, SQV, LPV/r                         | 9.1                                 |
| 2 <sup>c</sup>   | 516                                                                 | <50                                                          | ABC, TDF, NVP                                | 8.3                                 |
| 4 <sup>c</sup>   | 330                                                                 | <50                                                          | AZT, 3TC, NFV                                | 7.6                                 |
| 5 <sup>c</sup>   | 610                                                                 | <50                                                          | ABC, 3TC, NVP                                | 8.1                                 |
| 7 <sup>c</sup>   | 520                                                                 | <50                                                          | 3TC, TDF, EFV, LPV/r                         | 8.0                                 |
| 8 <sup>c</sup>   | 662                                                                 | <50                                                          | AZT, 3TC, EFV                                | 8.6                                 |
| J2 <sup>d</sup>  | 574                                                                 | <50                                                          | ABV, TDF, NVP                                | 9.9                                 |
| J7 <sup>d</sup>  | 371                                                                 | <50                                                          | AZT, 3TC, LPV/r                              | 7.1                                 |
| 182 <sup>e</sup> | 1101                                                                | <50                                                          | ABV, 3TC, EFV                                | 6.3                                 |
| 202 <sup>e</sup> | 618                                                                 | <50                                                          | SQV, LPV/r, ENF                              | 6                                   |
| 206 <sup>e</sup> | 724                                                                 | <50                                                          | FTC, TFV, AZV/r                              | 6.4                                 |
| 209 <sup>e</sup> | 428                                                                 | <50                                                          | 3TC, AZT, IDV, TFV                           | 5.9                                 |
| 99 <sup>f</sup>  | 451                                                                 | <50                                                          | d4T, 3TC, TDF LPV                            | 1.3 <sup>g</sup>                    |
| 113 <sup>f</sup> | 306                                                                 | <50                                                          | 3TC, ABV, NFV                                | 3.0 <sup>g</sup>                    |
| 134 <sup>f</sup> | 394                                                                 | <50                                                          | 3TC, TDF, EFV                                | 0.9 <sup>g</sup>                    |
| 135 <sup>f</sup> | 445                                                                 | <50                                                          | AZT, 3TC, SQV, RTV                           | 6.6 <sup>g</sup>                    |
| 136 <sup>f</sup> | 696                                                                 | <50                                                          | AZT, 3TC, EFV                                | 3.3 <sup>g</sup>                    |
| 139 <sup>f</sup> | 475                                                                 | <50                                                          | EFV, APV, LPV                                | 2.8 <sup>g</sup>                    |
| 147 <sup>f</sup> | 502                                                                 | <50                                                          | TDF, EFV, SQV, RTV                           | 0.9 <sup>g</sup>                    |
| 148 <sup>f</sup> | 670                                                                 | <50                                                          | ddl, NVP, LPV                                | 2.9 <sup>g</sup>                    |
| 154 <sup>f</sup> | 167                                                                 | <50                                                          | AZT, 3TC, ABC, TDF, LPV                      | 1.4 <sup>g</sup>                    |

<sup>a</sup>HIV RNA measured by Roche Amplicor Monitor version 1.5, with a detection limit of 50 copies of HIV RNA per mL of plasma.

<sup>b</sup>Drugs used in the various HAART regimens included zidovudine (AZT), abacavir (ABC), lamivudine (3TC), tenofovir (TDF), efavirenz (EFV), nevirapine (NVP), lopinavir/ritonavir (LPV/r), ritonavir (RTV), nelfinavir (NFV), saquinavir (SQV), enfuvirtide (ENF), atazanavir/ritonavir (AZV,r), emtricitabine (FTC), tenofovir (TFV), indinavir (IDV), stavudine (d4T), lopinavir (LPV), abacavir (ABV), amprenavir (APV), and didanosine (ddl).

<sup>c</sup>Patient sequences derived from Chun *et al.* (10).

<sup>d</sup>Patient sequences derived from Chun *et al.* (11).

<sup>e</sup>New patients analyzed for this study.

<sup>f</sup>Patient sequences derived from Bailey *et al.* (1).

<sup>g</sup>Duration of current regimen only.
