# Supplementary material
Source: PubMed Central journal article supplement (PMC2738142)
Supplement: supp_83_17_8470__5.pdf [file supp_83_17_8470__5.pdf]

**Supplementary Table 3** Periodic Sampling Data for Newly Enrolled Patients

| Patient | Time After Study<br>Entry (Days) | Number of Independent Sequences |                                  |
|---------|----------------------------------|---------------------------------|----------------------------------|
|         |                                  | Free Plasma Virus               | Resting CD4 <sup>+</sup> T Cells |
| 182     | 0                                | 5                               | 74                               |
|         | 34                               | 0                               | 0                                |
|         | 54                               | 25                              | 19                               |
|         | 111                              | 0                               | 0                                |
|         | 145                              | 10                              | 0                                |
|         | 648                              | 0                               | 0                                |
| 202     | 0                                | 1                               | 18                               |
|         | 118                              | 14                              | 0                                |
|         | 442                              | 12                              | 0                                |
| 206     | 0                                | 1                               | 24                               |
|         | 294                              | 23                              | 0                                |
| 209     | 0                                | 9                               | 35                               |
|         | 68                               | 84                              | 54                               |
|         | 309                              | 58                              | 24                               |
|         | 539                              | 111                             | 0                                |
